# Supplementary material for: Clinical significance of low forced expiratory flow between 25% and 75% of vital capacity following treated pulmonary tuberculosis: a cross-sectional study
Source: PubMed Central journal article supplement — BMJ Open. 2014 Jul 23;4(7):e005361. doi: 10.1136/bmjopen-2014-005361 (PMC4120340; doi:10.1136/bmjopen-2014-005361), 2014-07-23
Supplement: bmjopen-2014-005361.draft_revisions.pdf [file bmjopen-2014-005361.draft_revisions.pdf]

# BMJ Open

## Clinical significance of low forced expiratory flow between 25% and 75% of vital capacity following treated pulmonary tuberculosis

|                                 |                                                                                                                                                                                                                                                                                                                                                                                                                                                                                                                                                      |
|---------------------------------|------------------------------------------------------------------------------------------------------------------------------------------------------------------------------------------------------------------------------------------------------------------------------------------------------------------------------------------------------------------------------------------------------------------------------------------------------------------------------------------------------------------------------------------------------|
| Journal:                        | <i>BMJ Open</i>                                                                                                                                                                                                                                                                                                                                                                                                                                                                                                                                      |
| Manuscript ID:                  | bmjopen-2014-005361                                                                                                                                                                                                                                                                                                                                                                                                                                                                                                                                  |
| Article Type:                   | Research                                                                                                                                                                                                                                                                                                                                                                                                                                                                                                                                             |
| Date Submitted by the Author:   | 30-Mar-2014                                                                                                                                                                                                                                                                                                                                                                                                                                                                                                                                          |
| Complete List of Authors:       | Pefura-Yone, Eric Walter; Yaounde Jamot's Hospital, ; Faculty of Medicine and Biomedical Sciences, University of Yaounde 1, Internal medicine and specialities<br>Kengne, Andre; South African Medical Research Council & University of Cape Town, ; The George Institute for Global Health,<br>Kamdem-Tagne, Pierre Eugene; Faculty of Medicine and Biomedical Sciences, University of Yaounde 1, Internal medicine and specialities<br>AFANE ZE, Emmanuel; Faculty of Medicine and Biomedical Sciences, University of Yaounde 1, Internal Medicine |
| <b>Primary Subject Heading</b>: | Respiratory medicine                                                                                                                                                                                                                                                                                                                                                                                                                                                                                                                                 |
| Secondary Subject Heading:      | Infectious diseases                                                                                                                                                                                                                                                                                                                                                                                                                                                                                                                                  |
| Keywords:                       | Chronic airways disease < THORACIC MEDICINE, Tuberculosis < INFECTIOUS DISEASES, Respiratory physiology < THORACIC MEDICINE                                                                                                                                                                                                                                                                                                                                                                                                                          |
|                                 |                                                                                                                                                                                                                                                                                                                                                                                                                                                                                                                                                      |

SCHOLARONE™  
Manuscripts

only

1  
2  
3 **Clinical significance of low forced expiratory flow between 25% and 75% of vital**  
4 **capacity following treated pulmonary tuberculosis**  
5

6  
7 Eric Walter PEFURA-YONE (1,2), André Pascal KENGNE (3), Pierre Eugene TAGNE-  
8 KAMDEM (1), Emmanuel AFANE-ZE (1,2)  
9

10  
11 1) Department of Internal Medicine and Subspecialties, Faculty of Medicine and Biomedical  
12 Sciences, University of Yaounde I, Cameroon  
13

14  
15 2) Pneumology service, Yaounde Jamot Hospital, Cameroon  
16

17  
18 3) South African Medical Research Council & University of Cape Town, South Africa  
19

20 **Correspondence to:**

21  
22 Dr Eric Walter PEFURA-YONE,  
23

24 PO Box 8340-Yaounde, Cameroon  
25

26  
27 Tel: (237)96539726,  
28

29  
30 Email: pefura2002@yahoo.fr  
31

32 **Tables: 3**  
33

34 **Figures: 0**  
35

36 **Online only material: 0**  
37

38 **Key words:** distal airflow obstruction; tuberculosis; sequelae; chronic respiratory symptoms  
39

40 **Word count:** abstract-283; Main text (excluding tables, figures, abstract & references)-2452  
41

42 **References: 25**  
43  
44  
45  
46  
47  
48  
49  
50  
51  
52  
53  
54  
55  
56  
57  
58  
59  
60

## ABSTRACT

**Objectives:** The aim of this study was to assess the prevalence and determinants of post-tuberculosis chronic respiratory signs, and to assess the clinical impact of a low forced expiratory flow between 25% and 75% (FEF<sub>25-75%</sub>) in a group of individuals previously treated successfully for pulmonary tuberculosis.

**Design:** This was a cross-sectional study involving individuals in their post-tuberculosis treatment period. They all underwent a spirometry following the 2005 criteria of the American Thoracic Society /European Respiratory Society. Distal airflow obstruction (DAO) was defined by a FEF<sub>25-75%</sub> < 65% and a ratio forced expiratory volume during the first second (FEV<sub>1</sub>)/forced vital capacity (FVC) ≥ 0.70. Logistic regression models were used to investigate the determinants of persisting respiratory symptoms following anti-tuberculous treatment.

**Setting:** This study was carried out in the tuberculosis diagnosis and treatment centre at Yaounde Jamot Hospital, which serves as a referral centre for tuberculosis and respiratory diseases for the capital city of Cameroon (Yaounde) and surrounding areas.

**Participants:** All consecutive patients in their post-tuberculosis treatment period were consecutively enrolled between November 2012 and April 2013.

**Results:** Of the 177 patients included, 101 (57.1%) were men and median age (25<sup>th</sup>-75<sup>th</sup> percentiles) was 32 (24-45.5) years. At least one chronic respiratory sign was present in 110 (62.1%) participants and DAO was found in 67 (62.9%). Independent determinants of persisting respiratory signs were the duration of symptoms prior to tuberculosis diagnosis higher than 12 weeks (adjusted odd ratio 2.91; 95% confidence interval: 1.12-7.60, p=0.029) and presence of DAO (2.22; 1.13-4.38, p=0.021).

**Conclusions:** FEF<sub>25-75%</sub> < 65% is useful for the assessment and diagnosis of post-tuberculous DAO. Mass education targeting early diagnosis of pulmonary tuberculosis can potentially reduce the prevalence of post-tuberculosis respiratory signs and distal airflow obstruction.

**STRENGTHS AND LIMITATIONS OF THIS STUDY**

- This is a cross-sectional study, precluding any inference about the direction of the relationships found in the study.
- It is likely that distal airflow obstruction in our study was the consequence of pulmonary tuberculosis, considering that all patients with known chronic bronchitis prior to tuberculosis occurrence were excluded.
- The relatively large number of patients included is a major strength.
- This study uses robust methods to assess the relation between post-tuberculosis chronic respiratory symptoms and distal airflow obstruction

## INTRODUCTION

Pulmonary tuberculosis, the commonest form of tuberculosis, is an important public health challenge worldwide.[1] The clinical presentation of pulmonary tuberculosis usually combines general signs with chronic respiratory signs including cough and expectoration.[2] The presence of dyspnoea during pulmonary tuberculosis usually indicates the extensive nature of the pulmonary lesions.[2] Radiographic and functional sequels are very frequent following tuberculosis treatment, and ad-integrum restitution of the lungs is rather less frequent.[3-5] While functional sequels are mostly due to restrictive or mixed functional disorders,[6-8] post-tuberculosis airflow obstruction is also present in an important number of patients.[8-11] The prevalence of post-tuberculosis airflow obstruction ranges between 5% and 30% across published studies.[12-15] Furthermore, pathophysiological studies suggest that lesions affecting exclusively the distal respiratory pathways are possible during pulmonary tuberculosis.[10]

We are not aware of published studies on post-tuberculosis distal airflow obstruction (DAO) and the possible connection with persistence of respiratory signs following treatment for pulmonary tuberculosis. The assessment of DAO in routine practice is still a challenge with regard to the indices to be used; however, many have suggested mean median expiratory flow or forced expiratory flow between 25% and 75% (FEF<sub>25-75%</sub>) to be useful for this purpose. The wide variability of this index limits the possibility of defining a reliable optimal threshold for diagnosing DAO.[16] The thresholds of 65% or 60% have been applied in children to characterise distal airflow obstruction.[17, 18] The aim of this study was to determine the prevalence and factors associated with post-tuberculosis chronic respiratory signs, and to assess the clinical impact of a low FEF<sub>25-75%</sub> in a group of patients successfully treated for pulmonary tuberculosis.

## MATERIALS AND METHODS

### Study setting and participants

This study was conducted in the Center for Diagnosis and Treatment of tuberculosis (CDT) of the Yaounde Jamot Hospital (YJH) between November 2012 and April 2013 (6 months duration). This centre has been described in details previously.[19, 20] In short, YJH is the reference centre for tuberculosis and chest diseases for the Capital city of Cameroon

1  
2  
3 (Yaounde) and surrounding areas. Over the last five years, the centre has diagnosed and  
4 treated an average of 1600 to 1800 patients with tuberculosis per year.  
5  
6

7 All patients age 18 years and above, successfully treated for bacteriologically proven  
8 pulmonary tuberculosis (new case or re-treatment) were invited to take part in the study.  
9 Bacteriological proofs of pulmonary tuberculosis was based on the presence of acid fast  
10 bacillary (AFB) on at least one direct sputum smear examination,[21] or a positive sputum  
11 culture for *Mycobacterium tuberculosis*. Patients with any of the following conditions were  
12 excluded: patients with treatment failure, on-going bacterial pneumonia or within the four  
13 weeks preceding inclusion, chronic respiratory condition before TB diagnosis, on-going  
14 treatment with beta blockers, physical or mental inability to perform spirometry test.  
15  
16  
17  
18  
19  
20

### 21 ***Pulmonary tuberculosis treatment***

22 Tuberculosis treatment at the CDT follows to the guidelines of the Cameroon National  
23 Tuberculosis Control Program (NTCP) and the World Health Organization (WHO)  
24 recommendations.[22, 23] Antituberculosis drugs are dispensed free of charge, and treatment  
25 regimens used are standard regimens of category I for new patients and of category II for re-  
26 treatment cases. New cases are treated with a regimen that includes an intensive phase of two  
27 months duration with rifampicin (R), isoniazid (H), ethambutol (E) and pyrazinamide (Z),  
28 followed by a 4-month continuation phase with rifampicin and isoniazid (2RHEZ/4RH).  
29 During re-treatment, category I medications (R, H, E, Z) are completed with streptomycin (S).  
30 Therefore, re-treatment cases are treated with RHEZS for two months, followed by one month  
31 on RHEZ and five months on RHE (2RHEZS/1RHEZ/5RHE). During the intensive phase,  
32 adherence is directly monitored by the healthcare team for patients admitted, and during  
33 weekly drug collection in those treated as outpatients. The continuation phase is conducted on  
34 the outpatient basis and adherence assessed during monthly visits for scripts renewal and  
35 drugs collection.  
36  
37  
38  
39  
40  
41  
42  
43  
44  
45  
46

### 47 ***Monitoring and outcomes of pulmonary tuberculosis treatment***

48 During treatment, sputum smear positive patients are re-examined for AFB at the end of  
49 month 2, 5 and 6 for new cases, and at the end of month 3, 5 and 8 for re-treated patients. At  
50 the end of the treatment, patients are ranked into mutually exclusive categories[22, 23] as: 1)  
51 cured – patient with negative smear at the last month of treatment and at least one of the  
52 preceding; 2) treatment completed – patient who has completed the treatment and for whom  
53 the smear result at the end of the last month is not available; 3) failure – patient with positive  
54  
55  
56  
57  
58  
59  
60

1  
2  
3 smear at the 5<sup>th</sup> month or later during treatment; 4) death – death from any cause during  
4 treatment; 5) defaulter – patient who's treatment has been interrupted for at least two  
5 consecutive months; 6) transfer – patient transferred to complete his treatment in another  
6 centre and who's treatment outcome is unknown.  
7  
8

## 9 10 **Procedures**

### 11 12 *Baseline data collection*

13  
14 In this cross-sectional study, baseline data were collected on socio-demographic, clinical,  
15 radiological and biological characteristics of patients. Socio-demographic data collected  
16 included age, sex, residence (urban vs. rural) and formal level of education. Past medical  
17 history data included current or former smoking (yes vs. no), past history of tuberculosis and  
18 co-morbidities (diabetes mellitus). Clinical details included: duration of symptoms prior to  
19 tuberculosis diagnosis, persistent of respiratory symptoms (cough, expectoration, dyspnoea).  
20 Radiographic data were collected on the extension of lungs involvement (number of fields  
21 affected), the type of lung lesions (cavities, fibrotic lesions), the presence of pleural effusion  
22 and mediastinal or hilar lymph nodes. Biological data included the results of the HIV test  
23 result. The study was approved by the administrative authorities of the YJH and institutional  
24 review board of the Faculty of Medicine and Biomedical Sciences of University of Yaounde  
25  
26  
27  
28  
29  
30  
31  
32  
33  
34  
35  
36  
37  
38  
39  
40  
41  
42  
43  
44  
45  
46  
47  
48  
49  
50  
51  
52  
53  
54  
55  
56  
57  
58  
59  
60  
1.

### 36 *Ventilatory variables measurement*

37  
38 Spirometric measurements were acquired with a digital turbine pneumotachograph (Spiro  
39 USB, Care fusion, Yorba Linda-USA) following the 1994 American Thoracic Society (ATS)  
40 standards.[24] All the pulmonary volumes and flow rates were automatically corrected for  
41 body temperature and pressure saturation. Measurements were done under the direct  
42 supervision of an experienced pneumologist who is also certified in lung function testing  
43 (EWPY). The different respiratory indices were measured without bronchodilators and  
44 included: forced vital capacity (FVC), forced expiratory volume during the first second  
45 (FEV1), forced expiratory flow between 25% and 75% of vital capacity (FEF<sub>25-75%</sub>) and the  
46 ratio FEV1/FVC. The acceptability and reproducibility criteria recommended by the ATS and  
47 European Respiratory Society (ERS) guidelines (ATS/ERS guidelines) were respected.[16] At  
48 least three manoeuvres up to a maximum of eight were performed as required to obtain the  
49 flow rate curve (FVC curve). A one minute resting period was observed between consecutive  
50  
51  
52  
53  
54  
55  
56  
57  
58  
59  
60

1  
2  
3 manoeuvres. Satisfactory exhalation was considered in the presence of any of the following:  
4 1) no change in exhaled volume (plateau on the volume-time curve) for 1 second after an  
5 exhalation time of at least 6 seconds; 2) the presence of a reasonable duration or plateau in the  
6 volume-time curve; 3) inability of the subject to continue to exhale.[16, 24] The largest values  
7 for FEV1 and FVC from three acceptable manoeuvres were retained. The authorized  
8 difference between the largest values of FVC or FEV1 of the three acceptable manoeuvres  
9 was inferior or equal to 0.150 L or 5%. The manoeuvre with the largest sum of FEV1 plus  
10 FVC was used to determine FEF<sub>25-75%</sub>. Predicted values were calculated using reference values  
11 based on the Global Lung Initiative (GLI) reference spirometric equations for black.[25]  
12 Included participants were categorised according to their FEF<sub>25-75%</sub> into 3 mutually exclusive  
13 groups: normal (FEF<sub>25-75%</sub> ≥ 80%), intermediate (65% ≤ FEF<sub>25-75%</sub> < 80%) and low (FEF<sub>25-75%</sub>  
14 < 65%). DAO was based on FEF<sub>25-75%</sub> < 65%.

### 23 **Statistical analysis**

24  
25  
26 Data were analysed with the use of SPSS v17 for Windows®. We have presented categorical  
27 variables as count (percentages) and quantitative variables as mean (standard deviation) or  
28 median (25<sup>th</sup>-75<sup>th</sup> percentiles. Group's comparison used chi square tests for categorical  
29 variables and Student's t-test for non-parametric equivalents for quantitative variables.  
30 Logistic regressions were then used to investigate the determinants of persisting chronic  
31 respiratory signs. Potential candidate determinants were first investigated in univariate  
32 analysis. Significant predictors (based on a threshold probability <0.1) were entered all  
33 together in the same multivariable model. A p-value<0.05 was used to characterise  
34 statistically significant results.

## 41 **RESULTS**

### 42 **General characteristics of the study population and prevalence of chronic respiratory signs**

43  
44  
45 A total of 189 patients were invited to take part in the study. One refused to consent, ten had  
46 incorrect spirometry records while one had a FEV1/FVC<0.70. Of the 177 participants  
47 included, 101 (57.1%) were men and median age (25<sup>th</sup>-75<sup>th</sup> percentile) was 32 (24-45.5) years.  
48 Thirty-five (19.8%) patients were current or ex-smokers, 23 (13%) had a prior history of  
49 pulmonary tuberculosis and 47 (26.6%) had co-incident HIV infection. At least one chronic  
50 respiratory sign (CRS) was found in 110 (62.1%) patients at the completion of the anti-  
51  
52  
53  
54  
55  
56  
57  
58  
59  
60



tuberculosis treatment. In details, 87 (49.2%), 62 (35%) and 99 (55.9%) patients had persisting cough, expectoration and dyspnoea respectively at treatment completion (Table 1).

**Table 1: Characteristics of study population at the end of tuberculosis treatment**

| Characteristics                                                                           | n=177 (%)     |
|-------------------------------------------------------------------------------------------|---------------|
| Baseline clinical characteristics                                                         |               |
| Male sex                                                                                  | 101 (57.1)    |
| Age, years, median (25 <sup>th</sup> -75 <sup>th</sup> )                                  | 32 (24-45.5)  |
| Median duration of symptoms before diagnosis, weeks (25 <sup>th</sup> -75 <sup>th</sup> ) | 8 (4-12)      |
| Current or past smoking                                                                   | 35 (19.8)     |
| Previous pulmonary tuberculosis                                                           | 23 (13)       |
| HIV infection                                                                             | 47 (26.6)     |
| Diabetes mellitus                                                                         | 4 (2.3)       |
| Radiological signs                                                                        |               |
| Extension of tuberculosis lesions > 4 zones                                               | 52/148 (35.1) |
| Cavitary disease                                                                          | 81/148 (45.8) |
| Persisting respiratory symptoms at the end of tuberculosis treatment                      |               |
| Any respiratory symptoms                                                                  | 110 (62.1)    |
| Cough                                                                                     | 87 (49.2)     |
| Expectoration                                                                             | 62 (35.0)     |
| Dyspnoea                                                                                  | 99 (55.9)     |
| Spirometry values at the end of tuberculosis treatment                                    |               |
| FEV1, %, mean (SD)                                                                        | 76.3 (19.0)   |
| FVC, %, mean (SD)                                                                         | 74.8 (18.2)   |
| FEV1/FVC                                                                                  | 0.86 (0.07)   |
| FEF <sub>25-75%</sub> , %, median (25 <sup>th</sup> -75 <sup>th</sup> )                   | 74 (56-94.5)  |

FEV1, forced expiratory volume in 1<sup>st</sup> second; FVC, forced vital capacity;  
FEF<sub>25-75%</sub>, forced expiratory flow between 25 and 75% FVC;  
SD, standard deviation

## Relationship between FEF<sub>25-75%</sub> and chronic respiratory signs

Table 2 shows the distribution of chronic respiratory signs at treatment completion, according to FEF<sub>25-75%</sub> categories. Seventy-five patients (42.4%) had normal FEF<sub>25-75%</sub>, 35 (19.8%) had intermediate FEF<sub>25-75%</sub>, while 67 (37.9%) had low FEF<sub>25-75%</sub>. Persisting cough, expectoration and dyspnoea were significantly more frequent among patients with low FEF<sub>25-75%</sub>. The frequency of at least one persisting chronic respiratory sign was 52% in patients with normal FEF<sub>25-75%</sub> and 74.6% among those with low FEF<sub>25-75%</sub> (p=0.005). The related odd ratio was 2.72 (95% confidence interval: 1.33-5.57).

**Table 2: Frequency of persistent respiratory symptoms and spirometry indices according to FEF<sub>25-75%</sub>**

| Symptoms                                                             | FEF <sub>25-75%</sub> ≥ 80%,<br>n=75 (%) | FEF <sub>25-75%</sub> between 65%<br>and 80%, n=35(%) | p-value <sup>§</sup> | FEF <sub>25-75%</sub> < 65%,<br>n=67 (%) | p-value <sup>¶</sup> |
|----------------------------------------------------------------------|------------------------------------------|-------------------------------------------------------|----------------------|------------------------------------------|----------------------|
| chronic cough                                                        | 28 (37.3)                                | 17 (48.6)                                             | 0.264                | 42 (62.7)                                | 0.003                |
| Chronic expectoration                                                | 20 (26.7)                                | 11 (31.4)                                             | 0.605                | 31 (46.3)                                | 0.015                |
| Chronic dyspnoea                                                     | 38 (50.7)                                | 16 (45.7)                                             | 0.628                | 45 (67.2)                                | 0.046                |
| Any chronic<br>respiratory symptoms                                  | 39 (52.0)                                | 21 (60.0)                                             | 0.433                | 50 (74.6)                                | 0.005                |
| FEV1, L, median (25 <sup>th</sup> -<br>75 <sup>th</sup> percentiles) | 89(82-100)                               | 73(62-82)                                             | <0.001               | 64(52-73)                                | <0.001               |
| CVF, L, (25 <sup>th</sup> -75 <sup>th</sup><br>percentiles)          | 83(74-92)                                | 72(61-83)                                             | <0.001               | 64(53-77)                                | <0.001               |
| FEV1/FVC, mean (SD)                                                  | 0.89(0.04)                               | 0.86(0.05)                                            | 0.005                | 0.81(0.06)                               | <0.001               |

FEV1, forced expiratory volume in 1<sup>st</sup> second; FVC, forced vital capacity; FEF<sub>25-75%</sub>, forced expiratory flow between 25 and 75% FVC; SD, standard deviation

FEF<sub>25-75%</sub>, forced expiratory flow between 25 and 75% of forced vital capacity

<sup>§</sup>, for comparison between normal and intermediate FEF<sub>25-75%</sub>;

<sup>¶</sup>, for comparison between normal and low FEF<sub>25-75%</sub>;

## Predictors of persisting respiratory signs at the completion of antituberculosis treatment

Univariable and multivariable adjusted determinants of persisting respiratory signs are shown in Table 3. Independent predictors of persisting signs were longer duration of symptoms prior

to tuberculosis diagnosis [odds ratio 2.91 (95% confidence interval: 1.91-7.60) for symptoms duration greater than 12 weeks], and DAO [2.22 (1.13-4.38)].

**Table 3: Determinants of persistent of chronic respiratory symptoms at the end of tuberculosis treatment**

| Facteurs                                 | Crude OR (95% CI) | p-value | Adjusted OR (95% CI) | p-value |
|------------------------------------------|-------------------|---------|----------------------|---------|
| Male sex                                 | 1.31 (0.71-2.44)  | 0.387   | /                    | /       |
| Age                                      | 1.01 (0.98-1.03)  | 0.646   | /                    | /       |
| Duration of symptoms > 12 weeks          | 3.31 (1.29-8.50)  | 0.013   | 2.91(1.12-7.60)      | 0.029   |
| Smoking                                  | 1.68 (0.75-3.76)  | 0.209   | /                    | /       |
| Previous pulmonary tuberculosis          | 1.86 (0.69-4.98)  | 0.218   | /                    | /       |
| HIV infection                            | 0.76 (0.39-1.51)  | 0.439   | /                    | /       |
| Extension of pulmonary lesions > 4 zones | 1.48 (0.71-3.07)  | 0.292   | /                    | /       |
| Cavitary disease                         | 1.12 (0.57-2.20)  | 0.751   | /                    | /       |
| Fibrotic lesions                         | 1.24 (0.59-2.62)  | 0.571   | /                    | /       |
| FEF <sub>25-75%</sub>                    | 2.45 (1.26-4.77)  | 0.008   | /                    | /       |
| ≥ 80%                                    | 1 (reference)     |         |                      | /       |
| 65%-79%                                  | 1.39 (0.61-3.13)  | 0.433   | /                    | /       |
| < 65%                                    | 2.72 (1.33-5.54)  | 0.006   | 2.22 (1.13-4.38)     | 0.021   |

FEF<sub>25-75%</sub>, forced expiratory flow between 25 and 75% of forced vital capacity; OR, odds ratio; CI, confidence interval

### Relationship of FEF<sub>25-75%</sub> with other spirometry indices

In this study, FEV1 and FVC were significantly low in patients with low or intermediate FEF<sub>25-75%</sub> compared to those with normal FEF<sub>25-75%</sub> (p<0.001). The ratio FEV1/FVC was higher in patients with normal (0.89) than in those with intermediate (0.86) or low (0.81) FEF<sub>25-75%</sub> (Table 2).

## DISCUSSION

The main findings from this study conducted among patients successfully treated for pulmonary tuberculosis in a region of medium endemicity for tuberculosis are the following : 1) the prevalence of persisting chronic respiratory signs after treatment is very high ; 2) about two in five patients with normal FEV1/FVC have DAO ; 3) DAO is more frequent among patients with persisting chronic respiratory signs after anti-tuberculosis treatment ; 4) long duration of symptoms prior to tuberculosis diagnosis is a predictive factor for persisting respiratory signs following successful treatment for tuberculosis.

Functional post-tuberculosis sequels have been largely characterised.[4, 10, 11] However, few studies have reported on persisting chronic respiratory signs following the treatment of pulmonary tuberculosis. Even in the absence of functional sequels, post-tuberculous persisting chronic respiratory signs can negatively impact on the quality of life of individuals. In our series, three fifths of patients had persisting chronic respiratory signs following treatment for pulmonary tuberculosis. In a recent review from South Africa, chronic bronchitis and dyspnoea were two to seven times more frequent in people with a history of tuberculosis than in those who had never had tuberculosis.[11]

Persisting chronic respiratory signs were associated with prolonged duration of symptoms prior to tuberculosis diagnosis in our study. Lee and co-workers also found that the presence of bronchial obstruction in the post-pulmonary tuberculosis treatment period was influenced by the duration of symptoms prior to starting treatment.[13] Distal bronchial obstruction was found in over a third of our participants. It was independently associated with persisting chronic pulmonary signs, and further associated with a worse profile of spirometry indices. These independent associations suggest that, in addition to confirming the bacteriological cure of the infection, people completing treatment for pulmonary tuberculosis should also be investigated for the presence of functional respiratory signs and indicators of distal airways lesions, in order to optimise their management. There are several interrelated mechanisms to explain the occurrence of post-tuberculous distal bronchial obstruction. Bronchial endothelial inflammation during pulmonary tuberculosis could lead to localised or generalised bronchial obstruction, pulmonary fibrosis, and increase airways' resistance. The destruction of the lung' parenchyma could also reduce the pulmonary compliance and cause the small airways to collapse.[10]

1  
2  
3 The cross-sectional nature is the main limitation of this study, precluding any inference about  
4 the direction of the relationships found in the study. However, in on historical cohort, Hnidzo  
5 and co-workers found a gradual decrease in the pulmonary function with the increasing  
6 episodes of tuberculosis.[7] It is likely that DAO in our study was the consequence of  
7 pulmonary tuberculosis, considering that all patients with known chronic bronchitis prior to  
8 tuberculosis occurrence were excluded. The relatively large number of patients included is a  
9 major strength.  
10  
11  
12  
13

14  
15 In conclusion, low  $FEF_{25-75\%}$  is useful criteria for diagnosing distal airflow obstruction in  
16 patients treated for pulmonary tuberculosis and who otherwise, have normal FEV1/FVC ratio.  
17 Persisting chronic respiratory signs following treatment for tuberculosis are very frequent and  
18 often associated with DAO. Furthermore, prolonged duration of symptoms prior to starting  
19 treatment appears to be a major determinant of persisting post-tuberculous chronic respiratory  
20 signs. Sensitisation of the population to consult early with tuberculosis-like symptoms has a  
21 potential for improving early diagnosis/treatment and reduction of the prevalence of post-  
22 tuberculosis DAO.  
23  
24  
25  
26  
27  
28  
29  
30  
31  
32  
33  
34  
35  
36  
37  
38  
39  
40  
41  
42  
43  
44  
45  
46  
47  
48  
49  
50  
51  
52  
53  
54  
55  
56  
57  
58  
59  
60

1  
2  
3 **Funding:** This research received no specific grant from any funding agency in the public,  
4 commercial or not-for-profit sectors.  
5

6  
7 **Contributors:** EWPY conceived the study, collected data, co-analysed the data and drafted  
8 the manuscript. APK contributed to study design, data analysis, drafting and critical revision  
9 of the manuscript. PETK collected data, co-analysed data and critical revised the manuscript.  
10 EAZ supervised data collection and critically revised the manuscript. All authors approved the  
11 final version of the manuscript.  
12  
13  
14

15  
16 **Competing interests:** None for all authors.  
17

18  
19 **Data Sharing Statement:** No additional data  
20

21 **Ethics approval:** Ethics approval was provided by the Institutional Review Board of  
22 Yaounde Jamot Hospital.  
23  
24  
25  
26  
27  
28  
29  
30  
31  
32  
33  
34  
35  
36  
37  
38  
39  
40  
41  
42  
43  
44  
45  
46  
47  
48  
49  
50  
51  
52  
53  
54  
55  
56  
57  
58  
59  
60

## REFERENCES

1. World Health Organisation. Global tuberculosis report 2013. [http://apps.who.int/iris/bitstream/10665/75938/1/9789241564502\\_eng.pdf](http://apps.who.int/iris/bitstream/10665/75938/1/9789241564502_eng.pdf) (Accessed 29 March 2014).
2. Aït-Khaled N, Alarcón E, Armengol R et al. Prise en charge de la tuberculose. Guide des éléments essentiels pour une bonne pratique. Sixième édn. Paris:Union Internationale Contre la Tuberculose et les Maladies Respiratoires, 2010:P10.
3. Al-Hajjaj MS, Joharjy IA. Predictors of radiological sequelae of pulmonary tuberculosis. *Acta Radiol* 2000; 41:533-7.
4. Sivaranjini S, Vanamail P, Eason J. Six minute walk test in people with tuberculosis sequelae. *Cardiopulm Phys Ther J* 2010; 21:5-10.
5. Pasipanodya JG, Miller TL, Vecino M, et al. Pulmonary impairment after tuberculosis. *Chest* 2007; 131:1817-24.
6. Chung KP, Chen JY, Lee CH, et al. Trends and predictors of changes in pulmonary function after treatment for pulmonary tuberculosis. *Clinics (Sao Paulo)* 2011; 66:549-56.
7. Hnizdo E, Singh T, Churchyard G. Chronic pulmonary function impairment caused by initial and recurrent pulmonary tuberculosis following treatment. *Thorax* 2000; 55:32-38.
8. Ramos LM, Sulmonett N, Ferreira CS, et al. Functional profile of patients with tuberculosis sequelae in a university hospital. *J Bras Pneumol* 2006; 32:43-47.
9. Lee EJ, Lee SY, In KH, et al. Routine pulmonary function test can estimate the extent of tuberculous destroyed lung. *ScientificWorldJournal* 2012; 2012:835031.
10. Chakrabarti B, Calverley PM, Davies PD. Tuberculosis and its incidence, special nature, and relationship with chronic obstructive pulmonary disease. *Int J Chron Obstruct Pulmon Dis* 2007; 2:263-72.
11. Ehrlich RI, Adams S, Baatjies R, et al. Chronic airflow obstruction and respiratory symptoms following tuberculosis: a review of South African studies. *Int J Tuberc Lung Dis* 2011; 15:886-91.
12. Lee SW, Kim YS, Kim DS, et al. The risk of obstructive lung disease by previous pulmonary tuberculosis in a country with intermediate burden of tuberculosis. *J Korean Med Sci* 2011; 26:268-73.

13. Lee CH, Lee MC, Lin HH, et al. Pulmonary tuberculosis and delay in anti-tuberculous treatment are important risk factors for chronic obstructive pulmonary disease. *PLoS One* 2012; 7:e37978.
14. Menezes AM, Hallal PC, Perez-Padilla R, et al. Tuberculosis and airflow obstruction: evidence from the PLATINO study in Latin America. *Eur Respir J* 2007, 30:1180-5.
15. Akkara SA, Shah AD, Adalja M, et al. Pulmonary tuberculosis: the day after. *Int J Tuberc Lung Dis* 2013; 17:810-3.
16. Miller MR, Hankinson J, Brusasco V, et al. Standardisation of spirometry. *Eur Respir J* 2005, 26:319-38.
17. Ciprandi G, Capasso M, Tosca M, et al. A forced expiratory flow at 25-75% value <65% of predicted should be considered abnormal: a real-world, cross-sectional study. *Allergy Asthma Proc* 2012, 33:e5-8.
18. Rao DR, Gaffin JM, Baxi SN, et al. The utility of forced expiratory flow between 25% and 75% of vital capacity in predicting childhood asthma morbidity and severity. *J Asthma* 2012, 49:586-92.
19. Pefura Yone EW, Kengne AP, Kuaban C. Incidence, time and determinants of tuberculosis treatment default in Yaounde, Cameroon: a retrospective hospital register-based cohort study. *BMJ open* 2011, 1:e000289.
20. Yone EW, Kuaban C, Kengne AP. HIV testing, HIV status and outcomes of treatment for tuberculosis in a major diagnosis and treatment centre in Yaounde, Cameroon: a retrospective cohort study. *BMC Infect Dis* 2012; 12:190.
21. Programme National de Lutte contre la Tuberculose. Guide technique pour le personnel de santé. Yaounde. 2012.
22. National Tuberculosis Control Program. Manual for health personnel. Yaounde. 2006.
23. World Health Organisation. Treatment of tuberculosis guidelines. Geneva. 2009.
24. Standardization of Spirometry, 1994 Update. American Thoracic Society. *Am J Respir Crit Care Med* 1995; 152:1107-36.
25. Quanjer PH, Stanojevic S, Cole TJ, et al. Multi-ethnic reference values for spirometry for the 3-95-yr age range: the global lung function 2012 equations. *Eur Respir J* 2012; 40:1324-43.



STROBE 2007 (v4) Statement—Checklist of items that should be included in reports of *cross-sectional studies*

| Section/Topic                | Item # | Recommendation                                                                                                                                                                       | Reported on page # |
|------------------------------|--------|--------------------------------------------------------------------------------------------------------------------------------------------------------------------------------------|--------------------|
| Title and abstract           | 1      | (a) Indicate the study's design with a commonly used term in the title or the abstract                                                                                               | 2                  |
|                              |        | (b) Provide in the abstract an informative and balanced summary of what was done and what was found                                                                                  | 2                  |
| <b>Introduction</b>          |        |                                                                                                                                                                                      |                    |
| Background/rationale         | 2      | Explain the scientific background and rationale for the investigation being reported                                                                                                 | 4                  |
| Objectives                   | 3      | State specific objectives, including any prespecified hypotheses                                                                                                                     | 4                  |
| <b>Methods</b>               |        |                                                                                                                                                                                      |                    |
| Study design                 | 4      | Present key elements of study design early in the paper                                                                                                                              | 6                  |
| Setting                      | 5      | Describe the setting, locations, and relevant dates, including periods of recruitment, exposure, follow-up, and data collection                                                      | 4,5                |
| Participants                 | 6      | (a) Give the eligibility criteria, and the sources and methods of selection of participants                                                                                          | 5                  |
| Variables                    | 7      | Clearly define all outcomes, exposures, predictors, potential confounders, and effect modifiers. Give diagnostic criteria, if applicable                                             | 5,6,7              |
| Data sources/<br>measurement | 8*     | For each variable of interest, give sources of data and details of methods of assessment (measurement). Describe comparability of assessment methods if there is more than one group | 6,7                |
| Bias                         | 9      | Describe any efforts to address potential sources of bias                                                                                                                            | 5                  |
| Study size                   | 10     | Explain how the study size was arrived at                                                                                                                                            | /                  |
| Quantitative variables       | 11     | Explain how quantitative variables were handled in the analyses. If applicable, describe which groupings were chosen and why                                                         | 7                  |
| Statistical methods          | 12     | (a) Describe all statistical methods, including those used to control for confounding                                                                                                | 7                  |
|                              |        | (b) Describe any methods used to examine subgroups and interactions                                                                                                                  | 7                  |
|                              |        | (c) Explain how missing data were addressed                                                                                                                                          | Not applicable     |
|                              |        | (d) If applicable, describe analytical methods taking account of sampling strategy                                                                                                   | Not applicable     |
|                              |        | (e) Describe any sensitivity analyses                                                                                                                                                | Not applicable     |
| <b>Results</b>               |        |                                                                                                                                                                                      |                    |

|                          |     |                                                                                                                                                                                                              |                |
|--------------------------|-----|--------------------------------------------------------------------------------------------------------------------------------------------------------------------------------------------------------------|----------------|
| Participants             | 13* | (a) Report numbers of individuals at each stage of study—eg numbers potentially eligible, examined for eligibility, confirmed eligible, included in the study, completing follow-up, and analysed            | 7              |
|                          |     | (b) Give reasons for non-participation at each stage                                                                                                                                                         | 7              |
|                          |     | (c) Consider use of a flow diagram                                                                                                                                                                           | /              |
| Descriptive data         | 14* | (a) Give characteristics of study participants (eg demographic, clinical, social) and information on exposures and potential confounders                                                                     | 7,8            |
|                          |     | (b) Indicate number of participants with missing data for each variable of interest                                                                                                                          | Not applicable |
| Outcome data             | 15* | Report numbers of outcome events or summary measures                                                                                                                                                         | 9              |
| Main results             | 16  | (a) Give unadjusted estimates and, if applicable, confounder-adjusted estimates and their precision (eg, 95% confidence interval). Make clear which confounders were adjusted for and why they were included | 9,10           |
|                          |     | (b) Report category boundaries when continuous variables were categorized                                                                                                                                    | 9,10           |
|                          |     | (c) If relevant, consider translating estimates of relative risk into absolute risk for a meaningful time period                                                                                             | Not applicable |
| Other analyses           | 17  | Report other analyses done—eg analyses of subgroups and interactions, and sensitivity analyses                                                                                                               | /              |
| <b>Discussion</b>        |     |                                                                                                                                                                                                              |                |
| Key results              | 18  | Summarise key results with reference to study objectives                                                                                                                                                     | 11             |
| Limitations              | 19  | Discuss limitations of the study, taking into account sources of potential bias or imprecision. Discuss both direction and magnitude of any potential bias                                                   | 12             |
| Interpretation           | 20  | Give a cautious overall interpretation of results considering objectives, limitations, multiplicity of analyses, results from similar studies, and other relevant evidence                                   | 11,12          |
| Generalisability         | 21  | Discuss the generalisability (external validity) of the study results                                                                                                                                        | 11             |
| <b>Other information</b> |     |                                                                                                                                                                                                              |                |
| Funding                  | 22  | Give the source of funding and the role of the funders for the present study and, if applicable, for the original study on which the present article is based                                                | 12             |

\*Give information separately for cases and controls in case-control studies and, if applicable, for exposed and unexposed groups in cohort and cross-sectional studies.

**Note:** An Explanation and Elaboration article discusses each checklist item and gives methodological background and published examples of transparent reporting. The STROBE checklist is best used in conjunction with this article (freely available on the Web sites of PLoS Medicine at <http://www.plosmedicine.org/>, Annals of Internal Medicine at <http://www.annals.org/>, and Epidemiology at <http://www.epidem.com/>). Information on the STROBE Initiative is available at [www.strobe-statement.org](http://www.strobe-statement.org).

# BMJ Open

## Clinical significance of low forced expiratory flow between 25% and 75% of vital capacity following treated pulmonary tuberculosis: a cross-sectional study

|                                 |                                                                                                                                                                                                                                                                                                                                                                                                                                                                                                                                                      |
|---------------------------------|------------------------------------------------------------------------------------------------------------------------------------------------------------------------------------------------------------------------------------------------------------------------------------------------------------------------------------------------------------------------------------------------------------------------------------------------------------------------------------------------------------------------------------------------------|
| Journal:                        | <i>BMJ Open</i>                                                                                                                                                                                                                                                                                                                                                                                                                                                                                                                                      |
| Manuscript ID:                  | bmjopen-2014-005361.R1                                                                                                                                                                                                                                                                                                                                                                                                                                                                                                                               |
| Article Type:                   | Research                                                                                                                                                                                                                                                                                                                                                                                                                                                                                                                                             |
| Date Submitted by the Author:   | 29-Jun-2014                                                                                                                                                                                                                                                                                                                                                                                                                                                                                                                                          |
| Complete List of Authors:       | Pefura-Yone, Eric Walter; Yaounde Jamot's Hospital, ; Faculty of Medicine and Biomedical Sciences, University of Yaounde 1, Internal medicine and specialities<br>Kengne, Andre; South African Medical Research Council & University of Cape Town, ; The George Institute for Global Health,<br>Kamdem-Tagne, Pierre Eugene; Faculty of Medicine and Biomedical Sciences, University of Yaounde 1, Internal medicine and specialities<br>AFANE ZE, Emmanuel; Faculty of Medicine and Biomedical Sciences, University of Yaounde 1, Internal Medicine |
| <b>Primary Subject Heading</b>: | Respiratory medicine                                                                                                                                                                                                                                                                                                                                                                                                                                                                                                                                 |
| Secondary Subject Heading:      | Infectious diseases                                                                                                                                                                                                                                                                                                                                                                                                                                                                                                                                  |
| Keywords:                       | Chronic airways disease < THORACIC MEDICINE, Tuberculosis < INFECTIOUS DISEASES, Respiratory physiology < THORACIC MEDICINE                                                                                                                                                                                                                                                                                                                                                                                                                          |
|                                 |                                                                                                                                                                                                                                                                                                                                                                                                                                                                                                                                                      |

SCHOLARONE™  
Manuscripts

only

1  
2  
3 **Clinical significance of low forced expiratory flow between 25% and 75% of vital**  
4 **capacity following treated pulmonary tuberculosis: a cross-sectional study**  
5

6  
7 Eric Walter PEFURA-YONE (1,2), André Pascal KENGNE (3), Pierre Eugene TAGNE-  
8 KAMDEM (1), Emmanuel AFANE-ZE (1,2)  
9

10  
11 1) Department of Internal Medicine and Subspecialties, Faculty of Medicine and Biomedical  
12 Sciences, University of Yaounde I, Cameroon  
13

14  
15 2) Pneumology service, Yaounde Jamot Hospital, Cameroon  
16

17  
18 3) South African Medical Research Council & University of Cape Town, South Africa  
19

20 **Correspondence to:**

21  
22 Dr Eric Walter PEFURA-YONE,  
23

24  
25 PO Box 8340-Yaounde, Cameroon  
26

27  
28 Tel: (237)96539726,  
29

30  
31 Email: pefura2002@yahoo.fr  
32

33 **Tables: 3**

34  
35 **Figures: 0**  
36

37  
38 **Online only material: 0**  
39

40 **Key words:** distal airflow obstruction; tuberculosis; sequelae; chronic respiratory symptoms  
41

42 **Word count:** abstract-283; Main text (excluding tables, figures, abstract & references)-2452  
43

44  
45 **References: 25**  
46  
47  
48  
49  
50  
51  
52  
53  
54  
55  
56  
57  
58  
59  
60

## ABSTRACT

**Objectives:** The aim of this study was to assess the prevalence and determinants of post-tuberculosis chronic respiratory signs, and to assess the clinical impact of a low forced expiratory flow between 25% and 75% (FEF<sub>25-75%</sub>) in a group of individuals previously treated successfully for pulmonary tuberculosis.

**Design:** This was a cross-sectional study involving individuals in their post-tuberculosis treatment period. They all underwent a spirometry following the 2005 criteria of the American Thoracic Society /European Respiratory Society. Distal airflow obstruction (DAO) was defined by a FEF<sub>25-75%</sub> < 65% and a ratio forced expiratory volume during the first second (FEV<sub>1</sub>)/forced vital capacity (FVC) ≥ 0.70. Logistic regression models were used to investigate the determinants of persisting respiratory symptoms following anti-tuberculous treatment.

**Setting:** This study was carried out in the tuberculosis diagnosis and treatment center at Yaounde Jamot Hospital, which serves as a referral center for tuberculosis and respiratory diseases for the capital city of Cameroon (Yaounde) and surrounding areas.

**Participants:** All consecutive patients in their post-tuberculosis treatment period were consecutively enrolled between November 2012 and April 2013.

**Results:** Of the 177 patients included, 101 (57.1%) were men and median age (25<sup>th</sup>-75<sup>th</sup> percentiles) was 32 (24-45.5) years. At least one chronic respiratory sign was present in 110 (62.1%) participants and DAO was found in 67 (62.9%). Independent determinants of persisting respiratory signs were the duration of symptoms prior to tuberculosis diagnosis higher than 12 weeks (adjusted odd ratio 2.91; 95% confidence interval: 1.12-7.60, p=0.029) and presence of DAO (2.22; 1.13-4.38, p=0.021).

**Conclusions:** FEF<sub>25-75%</sub> < 65% is useful for the assessment and diagnosis of post-tuberculous DAO. Mass education targeting early diagnosis of pulmonary tuberculosis can potentially reduce the prevalence of post-tuberculosis respiratory signs and distal airflow obstruction.

**STRENGTHS AND LIMITATIONS OF THIS STUDY**

- This is a cross-sectional study, precluding any inference about the direction of the relationships found in the study.
- It is likely that distal airflow obstruction in our study was the consequence of pulmonary tuberculosis, considering that all patients with known chronic bronchitis prior to tuberculosis occurrence were excluded.
- The relatively large number of patients included is a major strength.
- This study uses robust methods to assess the relation between post-tuberculosis chronic respiratory symptoms and distal airflow obstruction

## INTRODUCTION

Pulmonary tuberculosis, the commonest form of tuberculosis, is an important public health challenge worldwide.[1] The clinical presentation of pulmonary tuberculosis usually combines general signs with chronic respiratory signs including cough and expectoration.[2] The presence of dyspnoea during pulmonary tuberculosis usually indicates the extensive nature of the pulmonary lesions.[2] Radiographic and functional sequels are very frequent following tuberculosis treatment, and ad-integrum restitution of the lungs is rather less frequent.[3-5] While functional sequels are mostly due to restrictive or mixed functional disorders,[6-8] post-tuberculosis airflow obstruction is also present in an important number of patients.[8-11] The prevalence of post-tuberculosis airflow obstruction ranges between 5% and 30% across published studies.[12-15] Furthermore, pathophysiological studies suggest that lesions affecting exclusively the distal respiratory pathways are possible during pulmonary tuberculosis.[10]

We are not aware of published studies on post-tuberculosis distal airflow obstruction (DAO) and the possible connection with persistence of respiratory signs following treatment for pulmonary tuberculosis. The assessment of DAO in routine practice is still a challenge with regard to the indices to be used; however, many have suggested mean median expiratory flow or forced expiratory flow between 25% and 75% (FEF<sub>25-75%</sub>) to be useful for this purpose. The wide variability of this index limits the possibility of defining a reliable optimal threshold for diagnosing DAO.[16] The thresholds of 65% or 60% have been applied in children to characterise distal airflow obstruction.[17, 18] The aim of this study was to determine the prevalence and factors associated with post-tuberculosis chronic respiratory signs, and to assess the clinical impact of a low FEF<sub>25-75%</sub> in a group of patients successfully treated for pulmonary tuberculosis.

## MATERIALS AND METHODS

### Study setting and participants

This study was conducted in the Center for Diagnosis and Treatment of tuberculosis (CDT) of the Yaounde Jamot Hospital (YJH) between November 2012 and April 2013 (6 months duration). This centre has been described in details previously.[19, 20] In short, YJH is the reference centre for tuberculosis and chest diseases for the Capital city of Cameroon

1  
2  
3 (Yaounde) and surrounding areas. Over the last five years, the centre has diagnosed and  
4 treated an average of 1600 to 1800 patients with tuberculosis per year.  
5  
6

7 All patients age 18 years and above, successfully treated for bacteriologically proven  
8 pulmonary tuberculosis (new case or re-treatment) were invited to take part in the study.  
9 Bacteriological proofs of pulmonary tuberculosis was based on the presence of acid fast  
10 bacillary (AFB) on at least one direct sputum smear examination,[21] or a positive sputum  
11 culture for *Mycobacterium tuberculosis*. Sputum culture and drugs susceptibility test (DST)  
12 were done for all retreatment cases. Patients with any of the following conditions were  
13 excluded: patients with treatment failure, patients with resistance to at least one  
14 antituberculosis drug, on-going bacterial pneumonia or within the four weeks preceding  
15 inclusion, chronic respiratory condition before TB diagnosis, on-going treatment with beta  
16 blockers, physical or mental inability to perform spirometry test.  
17  
18  
19  
20  
21  
22  
23

### 24 ***Pulmonary tuberculosis treatment***

25  
26 Tuberculosis treatment at the CDT follows to the guidelines of the Cameroon National  
27 Tuberculosis Control Program (NTCP) and the World Health Organization (WHO)  
28 recommendations.[22, 23] Antituberculosis drugs are dispensed free of charge, and treatment  
29 regimens used are standard regimens of category I for new patients and of category II for re-  
30 treatment cases. New cases are treated with a regimen that includes an intensive phase of two  
31 months duration with rifampicin (R), isoniazid (H), ethambutol (E) and pyrazinamide (Z),  
32 followed by a 4-month continuation phase with rifampicin and isoniazid (2RHEZ/4RH).  
33 During re-treatment, category I medications (R, H, E, Z) are completed with streptomycin (S).  
34 Therefore, re-treatment cases are treated with RHEZS for two months, followed by one month  
35 on RHEZ and five months on RHE (2RHEZS/1RHEZ/5RHE). During the intensive phase,  
36 adherence is directly monitored by the healthcare team for patients admitted, and during  
37 weekly drug collection in those treated as outpatients. The continuation phase is conducted on  
38 the outpatient basis and adherence assessed during monthly visits for scripts renewal and  
39 drugs collection.  
40  
41  
42  
43  
44  
45  
46  
47  
48  
49

### 50 ***Monitoring and outcomes of pulmonary tuberculosis treatment***

51  
52 During treatment, sputum smear positive patients are re-examined for AFB at the end of  
53 month 2, 5 and 6 for new cases, and at the end of month 3, 5 and 8 for re-treated patients. At  
54 the end of the treatment, patients are ranked into mutually exclusive categories[22, 23] as: 1)  
55 cured – patient with negative smear at the last month of treatment and at least one of the  
56  
57  
58  
59  
60



1  
2  
3 preceding; 2) treatment completed – patient who has completed the treatment and for whom  
4 the smear result at the end of the last month is not available; 3) failure – patient with positive  
5 smear at the 5<sup>th</sup> month or later during treatment; 4) death – death from any cause during  
6 treatment; 5) defaulter – patient who’s treatment has been interrupted for at least two  
7 consecutive months; 6) transfer – patient transferred to complete his treatment in another  
8 centre and who’s treatment outcome is unknown.  
9  
10  
11  
12

## 13 **Procedures**

### 14 *Baseline data collection*

15  
16  
17  
18 In this cross-sectional study, baseline data were collected on socio-demographic, clinical,  
19 radiological and biological characteristics of patients. Socio-demographic data collected  
20 included age, sex, residence (urban vs. rural) and formal level of education. Past medical  
21 history data included current or former smoking (yes vs. no), past history of tuberculosis and  
22 co-morbidities (diabetes mellitus). Clinical details included: duration of symptoms prior to  
23 tuberculosis diagnosis, persistent of respiratory symptoms (cough, expectoration, dyspnoea).  
24 Patients whose symptoms continued at the end of TB treatment were considered as having  
25 persistent respiratory symptoms. Radiographic data were collected on the extension of lungs  
26 involvement (number of fields affected), the type of lung lesions (cavities, fibrotic lesions),  
27 the presence of pleural effusion and mediastinal or hilar lymph nodes. Biological data  
28 included the results of the HIV test result. The study was approved by the administrative  
29 authorities of the YJH and institutional review board of the Faculty of Medicine and  
30 Biomedical Sciences of University of Yaounde 1.  
31  
32  
33  
34  
35  
36  
37  
38  
39  
40

### 41 *Ventilatory variables measurement*

42  
43 The spirometric measurements were done in the month following the completion of TB  
44 treatment. Spirometric measurements were acquired with a digital turbine pneumotachograph  
45 (Spiro USB, Care fusion, Yorba Linda-USA) following the 1994 American Thoracic Society  
46 (ATS) standards.[24] All the pulmonary volumes and flow rates were automatically corrected  
47 for body temperature and pressure saturation. Measurements were done under the direct  
48 supervision of an experienced pneumologist who is also certified in lung function testing  
49 (EWPY). The different respiratory indices were measured without bronchodilators and  
50 included: forced vital capacity (FVC), forced expiratory volume during the first second  
51 (FEV1), forced expiratory flow between 25% and 75% of vital capacity (FEF<sub>25-75%</sub>) and the  
52  
53  
54  
55  
56  
57  
58  
59  
60

ratio FEV1/FVC. The acceptability and reproducibility criteria recommended by the ATS and European Respiratory Society (ERS) guidelines (ATS/ERS guidelines) were respected.[16] At least three manoeuvres up to a maximum of eight were performed as required to obtain the flow rate curve (FVC curve). A one minute resting period was observed between consecutive manoeuvres. Satisfactory exhalation was considered in the presence of any of the following: 1) no change in exhaled volume (plateau on the volume-time curve) for 1 second after an exhalation time of at least 6 seconds; 2) the presence of a reasonable duration or plateau in the volume-time curve; 3) inability of the subject to continue to exhale.[16, 24] The largest values for FEV1 and FVC from three acceptable manoeuvres were retained. The authorized difference between the largest values of FVC or FEV1 of the three acceptable manoeuvres was inferior or equal to 0.150 L or 5%. The manoeuvre with the largest sum of FEV1 plus FVC was used to determine FEF<sub>25-75%</sub>. Predicted values were calculated using reference values based on the Global Lung Initiative (GLI) reference spirometric equations for black.[25] Included participants were categorised according to their FEF<sub>25-75%</sub> into 3 mutually exclusive groups: normal (FEF<sub>25-75%</sub> ≥ 80%), intermediate (65% ≤ FEF<sub>25-75%</sub> < 80%) and low (FEF<sub>25-75%</sub> < 65%). DAO was based on FEF<sub>25-75%</sub> < 65%.

### Statistical analysis

Data were analysed with the use of SPSS v17 for Windows®. We have presented categorical variables as count (percentages) and quantitative variables as mean (standard deviation) or median (25<sup>th</sup>-75<sup>th</sup> percentiles. Group's comparison used chi square tests for categorical variables and Student's t-test for non-parametric equivalents for quantitative variables. Logistic regressions were then used to investigate the determinants of persisting chronic respiratory signs. Potential candidate determinants were first investigated in univariate analysis. Significant predictors (based on a threshold probability <0.1) were entered all together in the same multivariable model. A p-value <0.05 was used to characterise statistically significant results.

## RESULTS

### General characteristics of the study population and prevalence of chronic respiratory signs

A total of 189 patients were invited to take part in the study. One refused to consent, ten had incorrect spirometry records (not acceptable and/or not reproducible manoeuvres) while one

had a FEV1/FVC<0.70. Of the 177 participants included, 101 (57.1%) were men and median age (25<sup>th</sup>-75<sup>th</sup> percentile) was 32 (24-45.5) years. Thirty-five (19.8%) patients were current or ex-smokers, 23 (13%) had a prior history of pulmonary tuberculosis and 47 (26.6%) had co-incident HIV infection. At least one chronic respiratory sign (CRS) was found in 110 (62.1%) patients at the completion of the anti-tuberculosis treatment. In details, 87 (49.2%), 62 (35%) and 99 (55.9%) patients had persisting cough, expectoration and dyspnoea respectively at treatment completion (Table 1 and Figure 1).

**Table 1: Characteristics of study population at the end of tuberculosis treatment**

| Characteristics                                                                           | n=177 (%)     |
|-------------------------------------------------------------------------------------------|---------------|
| Baseline clinical characteristics                                                         |               |
| Male sex                                                                                  | 101 (57.1)    |
| Age, years, median (25 <sup>th</sup> -75 <sup>th</sup> )                                  | 32 (24-45.5)  |
| Median duration of symptoms before diagnosis, weeks (25 <sup>th</sup> -75 <sup>th</sup> ) | 8 (4-12)      |
| Current of past smoking                                                                   | 35 (19.8)     |
| Previous pulmonary tuberculosis                                                           | 23 (13)       |
| HIV infection                                                                             | 47 (26.6)     |
| Diabetes mellitus                                                                         | 4 (2.3)       |
| Radiological signs                                                                        |               |
| Extension of tuberculosis lesions > 4 zones                                               | 52/148 (35.1) |
| Cavitary disease                                                                          | 81/148 (45.8) |
| Persisting respiratory symptoms at the end of tuberculosis treatment                      |               |
| Any respiratory symptoms                                                                  | 110 (62.1)    |
| Cough                                                                                     | 87 (49.2)     |
| Expectoration                                                                             | 62 (35.0)     |
| Dyspnoea                                                                                  | 99 (55.9)     |
| Spirometry values at the end of tuberculosis treatment                                    |               |
| FEV1, %, mean (SD)                                                                        | 76.3 (19.0)   |
| FVC, %, mean (SD)                                                                         | 74.8 (18.2)   |
| FEV1/FVC                                                                                  | 0.86 (0.07)   |
| FEF <sub>25-75%</sub> , %, median (25 <sup>th</sup> -75 <sup>th</sup> )                   | 74 (56-94.5)  |

FEV1, forced expiratory volume in 1<sup>st</sup> second; FVC, forced vital capacity;

FEF<sub>25-75%</sub>, forced expiratory flow between 25 and 75% FVC;

SD, standard deviation

### Relationship between FEF<sub>25-75%</sub> and chronic respiratory signs

Table 2 shows the distribution of chronic respiratory signs at treatment completion, according to FEF<sub>25-75%</sub> categories. Seventy-five patients (42.4%) had normal FEF<sub>25-75%</sub>, 35 (19.8%) had intermediate FEF<sub>25-75%</sub>, while 67 (37.9%) had low FEF<sub>25-75%</sub>. Persisting cough, expectoration and dyspnoea were significantly more frequent among patients with low FEF<sub>25-75%</sub>. The frequency of at least one persisting chronic respiratory sign was 52% in patients with normal FEF<sub>25-75%</sub> and 74.6% among those with low FEF<sub>25-75%</sub> (p=0.005). The related odd ratio was 2.72 (95% confidence interval: 1.33-5.57).

**Table 2: Frequency of persistent respiratory symptoms and spirometry indices according to FEF<sub>25-75%</sub>**

| Symptoms                                                             | FEF <sub>25-75%</sub> ≥ 80%,<br>n=75 (%) | FEF <sub>25-75%</sub> between 65%<br>and 80%, n=35(%) | FEF <sub>25-75%</sub> < 65%,<br>n=67 (%) | p-value |
|----------------------------------------------------------------------|------------------------------------------|-------------------------------------------------------|------------------------------------------|---------|
| chronic cough                                                        | 28 (37.3)                                | 17 (48.6)                                             | 42 (62.7)                                | 0.011   |
| Chronic expectoration                                                | 20 (26.7)                                | 11 (31.4)                                             | 31 (46.3)                                | 0.050   |
| Chronic dyspnoea                                                     | 38 (50.7)                                | 16 (45.7)                                             | 45 (67.2)                                | 0.056   |
| Any chronic<br>respiratory symptoms                                  | 39 (52.0)                                | 21 (60.0)                                             | 50 (74.6)                                | 0.020   |
| FEV1, %, median (25 <sup>th</sup> -<br>75 <sup>th</sup> percentiles) | 89(82-100)                               | 73(62-82)                                             | 64(52-73)                                | <0.001  |
| FVC, %, (25 <sup>th</sup> -75 <sup>th</sup><br>percentiles)          | 83(74-92)                                | 72(61-83)                                             | 64(53-77)                                | <0.001  |
| FEV1/FVC, mean (SD)                                                  | 0.89(0.04)                               | 0.86(0.05)                                            | 0.81(0.06)                               | <0.001  |

FEV1, forced expiratory volume in 1<sup>st</sup> second; FVC, forced vital capacity; FEF<sub>25-75%</sub>, forced expiratory flow between 25 and 75% FVC; SD, standard deviation  
FEF<sub>25-75%</sub>, forced expiratory flow between 25 and 75% of forced vital capacity

### Predictors of persisting respiratory signs at the completion of antituberculosis treatment

Univariable and multivariable adjusted determinants of persisting respiratory signs are shown in Table 3. There is no association between smoking volume (pack-years) and persistent of CRS (data not shown). Independent predictors of persisting signs were longer duration of symptoms prior to tuberculosis diagnosis [odd ratio 2.91 (95% confidence interval: 1.91-7.60) for symptoms duration greater than 12 weeks], and DAO [2.22 (1.13-4.38)].

**Table 3: Determinants of persistent of chronic respiratory symptoms at the end of tuberculosis treatment**

| Facteurs                                    | Crude OR (95%<br>CI) | p-<br>value | Adjusted OR (95%<br>CI) | p-<br>value |
|---------------------------------------------|----------------------|-------------|-------------------------|-------------|
| Male sex                                    | 1.31 (0.71-2.44)     | 0.387       | /                       | /           |
| Age                                         | 1.01 (0.98-1.03)     | 0.646       | /                       | /           |
| Duration of symptoms > 12 weeks             | 3.31 (1.29-8.50)     | 0.013       | 2.91(1.12-7.60)         | 0.029       |
| Smoking                                     | 1.68 (0.75-3.76)     | 0.209       | /                       | /           |
| Previous pulmonary tuberculosis             | 1.86 (0.69-4.98)     | 0.218       | /                       | /           |
| HIV infection                               | 0.76 (0.39-1.51)     | 0.439       | /                       | /           |
| Extension of pulmonary lesions > 4<br>zones | 1.48 (0.71-3.07)     | 0.292       | /                       | /           |
| Cavitary disease                            | 1.12 (0.57-2.20)     | 0.751       | /                       | /           |
| Fibrotic lesions                            | 1.24 (0.59-2.62)     | 0.571       | /                       | /           |
| FEF <sub>25-75%</sub>                       | 2.45 (1.26-4.77)     | 0.008       | /                       | /           |
| ≥ 80%                                       | 1 (reference)        |             |                         | /           |
| 65%-79%                                     | 1.39 (0.61-3.13)     | 0.433       | /                       | /           |
| < 65%                                       | 2.72 (1.33-5.54)     | 0.006       | 2.22 (1.13-4.38)        | 0.021       |

FEF<sub>25-75%</sub>, forced expiratory flow between 25 and 75% of forced vital capacity; OR, odds ratio; CI, confidence interval

### Relationship of FEF<sub>25-75%</sub> with other spirometry indices

In this study, FEV1 and FVC were significantly low in patients with low or intermediate FEF<sub>25-75%</sub> compared to those with normal FEF<sub>25-75%</sub> ( $p < 0.001$ ). The ratio FEV1/FVC was higher in patients with normal (0.89) than in those with intermediate (0.86) or low (0.81) FEF<sub>25-75%</sub> (Table 2).

## DISCUSSION

The main findings from this study conducted among patients successfully treated for pulmonary tuberculosis in a region of medium endemicity for tuberculosis are the following : 1) the prevalence of persisting chronic respiratory signs after treatment is very high ; 2) about two in five patients with normal FEV1/FVC have DAO ; 3) DAO is more frequent among patients with persisting chronic respiratory signs after anti-tuberculosis treatment ; 4) long duration of symptoms prior to tuberculosis diagnosis is a predictive factor for persisting respiratory signs following successful treatment for tuberculosis.

Functional post-tuberculosis sequels have been largely characterised.[4, 10, 11] However, few studies have reported on persisting chronic respiratory signs following the treatment of pulmonary tuberculosis. Even in the absence of functional sequels, post-tuberculous persisting chronic respiratory signs can negatively impact on the quality of life of individuals. In our series, three fifths of patients had persisting chronic respiratory signs following treatment for pulmonary tuberculosis. In a recent review from South Africa, chronic bronchitis and dyspnoea were two to seven times more frequent in people with a history of tuberculosis than in those who had never had tuberculosis.[11]

Persisting chronic respiratory signs were associated with prolonged duration of symptoms prior to tuberculosis diagnosis in our study. Lee and co-workers also found that the presence of bronchial obstruction in the post-pulmonary tuberculosis treatment period was influenced by the duration of symptoms prior to starting treatment.[13] Distal bronchial obstruction was found in over a third of our participants. It was independently associated with persisting chronic pulmonary signs, and further associated with a worse profile of spirometry indices. These independent associations suggest that, in addition to confirming the bacteriological cure of the infection, people completing treatment for pulmonary tuberculosis should also be investigated for the presence of functional respiratory signs and indicators of distal airways lesions, in order to optimise their management. There are several interrelated mechanisms to explain the occurrence of post-tuberculous distal bronchial obstruction. Bronchial endothelial inflammation during pulmonary tuberculosis could lead to localised or generalised bronchial obstruction, pulmonary fibrosis, and increase airways' resistance. The destruction of the lung' parenchyma could also reduce the pulmonary compliance and cause the small airways to collapse.[10]

1  
2  
3 The cross-sectional nature is the main limitation of this study, precluding any inference about  
4 the direction of the relationships found in the study. However, in on historical cohort, Hnidzo  
5 and co-workers found a gradual decrease in the pulmonary function with the increasing  
6 episodes of tuberculosis.[7] It is likely that DAO in our study was the consequence of  
7 pulmonary tuberculosis, considering that all patients with known chronic bronchitis prior to  
8 tuberculosis occurrence were excluded. The relatively large number of patients included is a  
9 major strength.  
10  
11  
12  
13

14  
15 In conclusion, low FEF<sub>25-75%</sub> is useful criteria for diagnosing distal airflow obstruction in  
16 patients treated for pulmonary tuberculosis and who otherwise, have normal FEV1/FVC ratio.  
17 Persisting chronic respiratory signs following treatment for tuberculosis are very frequent and  
18 often associated with DAO. Furthermore, prolonged duration of symptoms prior to starting  
19 treatment appears to be a major determinant of persisting post-tuberculous chronic respiratory  
20 signs. Sensitisation of the population to consult early with tuberculosis-like symptoms has a  
21 potential for improving early diagnosis/treatment and reduction of the prevalence of post-  
22 tuberculosis DAO.  
23  
24  
25  
26  
27  
28  
29  
30  
31  
32  
33  
34  
35  
36  
37  
38  
39  
40  
41  
42  
43  
44  
45  
46  
47  
48  
49  
50  
51  
52  
53  
54  
55  
56  
57  
58  
59  
60



**Funding:** This research received no specific grant from any funding agency in the public, commercial or not-for-profit sectors.

**Contributors:** EWPY conceived the study, collected data, co-analysed the data and drafted the manuscript. APK contributed to study design, data analysis, drafting and critical revision of the manuscript. PETK collected data, co-analysed data and critical revised the manuscript. EAZ supervised data collection and critically revised the manuscript. All authors approved the final version of the manuscript.

**Competing interests:** None for all authors.

**Data Sharing Statement:** No additional data available

**Ethics approval:** Ethics approval was provided by the Institutional Review Board of Yaounde Jamot Hospital.

## REFERENCES

1. World Health Organisation. Global tuberculosis report 2013. [http://apps.who.int/iris/bitstream/10665/75938/1/9789241564502\\_eng.pdf](http://apps.who.int/iris/bitstream/10665/75938/1/9789241564502_eng.pdf) (Accessed 29 March 2014).
2. Aït-Khaled N, Alarcón E, Armengol R et al. Prise en charge de la tuberculose. Guide des éléments essentiels pour une bonne pratique. Sixième édn. Paris:Union Internationale Contre la Tuberculose et les Maladies Respiratoires, 2010:P10.
3. Al-Hajjaj MS, Joharjy IA. Predictors of radiological sequelae of pulmonary tuberculosis. *Acta Radiol* 2000; 41:533-7.
4. Sivaranjini S, Vanamail P, Eason J. Six minute walk test in people with tuberculosis sequelae. *Cardiopulm Phys Ther J* 2010; 21:5-10.
5. Pasipanodya JG, Miller TL, Vecino M, et al. Pulmonary impairment after tuberculosis. *Chest* 2007; 131:1817-24.
6. Chung KP, Chen JY, Lee CH, et al. Trends and predictors of changes in pulmonary function after treatment for pulmonary tuberculosis. *Clinics (Sao Paulo)* 2011; 66:549-56.



- 1  
2  
3 7. Hnizdo E, Singh T, Churchyard G. Chronic pulmonary function impairment caused by  
4 initial and recurrent pulmonary tuberculosis following treatment. *Thorax* 2000; 55:32-  
5 38.
- 6  
7  
8 8. Ramos LM, Sulmonett N, Ferreira CS, et al. Functional profile of patients with  
9 tuberculosis sequelae in a university hospital. *J Bras Pneumol* 2006; 32:43-47.
- 10  
11 9. Lee EJ, Lee SY, In KH, et al. Routine pulmonary function test can estimate the extent  
12 of tuberculous destroyed lung. *ScientificWorldJournal* 2012; 2012:835031.
- 13  
14 10. Chakrabarti B, Calverley PM, Davies PD. Tuberculosis and its incidence, special  
15 nature, and relationship with chronic obstructive pulmonary disease. *Int J Chron*  
16 *Obstruct Pulmon Dis* 2007; 2:263-72.
- 17  
18 11. Ehrlich RI, Adams S, Baatjies R, et al. Chronic airflow obstruction and respiratory  
19 symptoms following tuberculosis: a review of South African studies. *Int J Tuberc*  
20 *Lung Dis* 2011; 15:886-91.
- 21  
22 12. Lee SW, Kim YS, Kim DS, et al. The risk of obstructive lung disease by previous  
23 pulmonary tuberculosis in a country with intermediate burden of tuberculosis. *J*  
24 *Korean Med Sci* 2011; 26:268-73.
- 25  
26 13. Lee CH, Lee MC, Lin HH, et al. Pulmonary tuberculosis and delay in anti-tuberculous  
27 treatment are important risk factors for chronic obstructive pulmonary disease. *PLoS*  
28 *One* 2012; 7:e37978.
- 29  
30 14. Menezes AM, Hallal PC, Perez-Padilla R, et al. Tuberculosis and airflow obstruction:  
31 evidence from the PLATINO study in Latin America. *Eur Respir J* 2007, 30:1180-5.
- 32  
33 15. Akkara SA, Shah AD, Adalja M, et al. Pulmonary tuberculosis: the day after. *Int J*  
34 *Tuberc Lung Dis* 2013; 17:810-3.
- 35  
36 16. Miller MR, Hankinson J, Brusasco V, et al. Standardisation of spirometry. *Eur Respir*  
37 *J* 2005, 26:319-38.
- 38  
39 17. Ciprandi G, Capasso M, Tosca M, et al. A forced expiratory flow at 25-75% value  
40 <65% of predicted should be considered abnormal: a real-world, cross-sectional study.  
41 *Allergy Asthma Proc* 2012, 33:e5-8.
- 42  
43 18. Rao DR, Gaffin JM, Baxi SN, et al. The utility of forced expiratory flow between 25%  
44 and 75% of vital capacity in predicting childhood asthma morbidity and severity. *J*  
45 *Asthma* 2012, 49:586-92.
- 46  
47 19. Pefura Yone EW, Kengne AP, Kuaban C. Incidence, time and determinants of  
48 tuberculosis treatment default in Yaounde, Cameroon: a retrospective hospital  
49 register-based cohort study. *BMJ open* 2011, 1:e000289.
- 50  
51  
52  
53  
54  
55  
56  
57  
58  
59  
60

- 1
  - 2
  - 3
  - 4
  - 5
  - 6
  - 7
  - 8
  - 9
  - 10
  - 11
  - 12
  - 13
  - 14
  - 15
  - 16
  - 17
  - 18
  - 19
  - 20
  - 21
  - 22
  - 23
  - 24
  - 25
  - 26
  - 27
  - 28
  - 29
  - 30
  - 31
  - 32
  - 33
  - 34
  - 35
  - 36
  - 37
  - 38
  - 39
  - 40
  - 41
  - 42
  - 43
  - 44
  - 45
  - 46
  - 47
  - 48
  - 49
  - 50
  - 51
  - 52
  - 53
  - 54
  - 55
  - 56
  - 57
  - 58
  - 59
  - 60
20. Yone EW, Kuaban C, Kengne AP. HIV testing, HIV status and outcomes of treatment for tuberculosis in a major diagnosis and treatment centre in Yaounde, Cameroon: a retrospective cohort study. *BMC Infect Dis* 2012; 12:190.
21. Programme National de Lutte contre la Tuberculose. Guide technique pour le personnel de santé. Yaounde. 2012.
22. National Tuberculosis Control Program. Manual for health personnel. Yaounde. 2006.
23. World Health Organisation. Treatment of tuberculosis guidelines. Geneva. 2009.
24. Standardization of Spirometry, 1994 Update. American Thoracic Society. *Am J Respir Crit Care Med* 1995; 152:1107-36.
25. Quanjer PH, Stanojevic S, Cole TJ, et al. Multi-ethnic reference values for spirometry for the 3-95-yr age range: the global lung function 2012 equations. *Eur Respir J* 2012; 40:1324-43.

### Figure legend

Figure 1: Spirometric indices of study population

FEV1, forced expiratory volume in 1s; FVC, forced vital capacity; FEF25-75%, forced expiratory flow between 25% and 75%

1  
2  
3  
4  
5  
6  
7 **Clinical significance of low forced expiratory flow between 25% and 75% of vital**  
8 **capacity following treated pulmonary tuberculosis: a cross-sectional study**  
9

10 Eric Walter PEFURA-YONE (1,2), André Pascal KENGNE (3), Pierre Eugene TAGNE-  
11 KAMDEM (1), Emmanuel AFANE-ZE (1,2)  
12

13  
14 1) Department of Internal Medicine and Subspecialties, Faculty of Medicine and Biomedical  
15 Sciences, University of Yaounde I, Cameroon  
16

17 2) Pneumology service, Yaounde Jamot Hospital, Cameroon  
18

19 3) South African Medical Research Council & University of Cape Town, South Africa  
20

21 **Correspondence to:**  
22

23 Dr Eric Walter PEFURA-YONE,  
24

25 PO Box 8340-Yaounde, Cameroon  
26

27 Tel: (237)96539726,  
28

29 Email: pefura2002@yahoo.fr  
30  
31

32 **Tables: 3**  
33

34 **Figures: 0**  
35

36 **Online only material: 0**  
37

38 **Key words:** distal airflow obstruction; tuberculosis; sequelae; chronic respiratory symptoms  
39

40 **Word count:** abstract-283; Main text (excluding tables, figures, abstract & references)-2452  
41

42 **References: 25**  
43  
44  
45  
46  
47  
48  
49  
50  
51  
52  
53  
54  
55  
56  
57  
58  
59  
60

## ABSTRACT

**Objectives:** The aim of this study was to assess the prevalence and determinants of post-tuberculosis chronic respiratory signs, and to assess the clinical impact of a low forced expiratory flow between 25% and 75% (FEF<sub>25-75%</sub>) in a group of individuals previously treated successfully for pulmonary tuberculosis.

**Design:** This was a cross-sectional study involving individuals in their post-tuberculosis treatment period. They all underwent a spirometry following the 2005 criteria of the American Thoracic Society /European Respiratory Society. Distal airflow obstruction (DAO) was defined by a FEF<sub>25-75%</sub> < 65% and a ratio forced expiratory volume during the first second (FEV<sub>1</sub>)/forced vital capacity (FVC) ≥ 0.70. Logistic regression models were used to investigate the determinants of persisting respiratory symptoms following anti-tuberculous treatment.

**Setting:** This study was carried out in the tuberculosis diagnosis and treatment center at Yaounde Jamot Hospital, which serves as a referral center for tuberculosis and respiratory diseases for the capital city of Cameroon (Yaounde) and surrounding areas.

**Participants:** All consecutive patients in their post-tuberculosis treatment period were consecutively enrolled between November 2012 and April 2013.

**Results:** Of the 177 patients included, 101 (57.1%) were men and median age (25<sup>th</sup>-75<sup>th</sup> percentiles) was 32 (24-45.5) years. At least one chronic respiratory sign was present in 110 (62.1%) participants and DAO was found in 67 (62.9%). Independent determinants of persisting respiratory signs were the duration of symptoms prior to tuberculosis diagnosis higher than 12 weeks (adjusted odd ratio 2.91; 95% confidence interval: 1.12-7.60, p=0.029) and presence of DAO (2.22; 1.13-4.38, p=0.021).

**Conclusions:** FEF<sub>25-75%</sub> < 65% is useful for the assessment and diagnosis of post-tuberculous DAO. Mass education targeting early diagnosis of pulmonary tuberculosis can potentially reduce the prevalence of post-tuberculosis respiratory signs and distal airflow obstruction.

## STRENGTHS AND LIMITATIONS OF THIS STUDY

- This is a cross-sectional study, precluding any inference about the direction of the relationships found in the study.
- It is likely that distal airflow obstruction in our study was the consequence of pulmonary tuberculosis, considering that all patients with known chronic bronchitis prior to tuberculosis occurrence were excluded.
- The relatively large number of patients included is a major strength.
- This study uses robust methods to assess the relation between post-tuberculosis chronic respiratory symptoms and distal airflow obstruction

## INTRODUCTION

Pulmonary tuberculosis, the commonest form of tuberculosis, is an important public health challenge worldwide.[1] The clinical presentation of pulmonary tuberculosis usually

combines general signs with chronic respiratory signs including cough and expectoration.[2]

The presence of dyspnoea during pulmonary tuberculosis usually indicates the extensive nature of the pulmonary lesions.[2] Radiographic and functional sequels are very frequent

following tuberculosis treatment, and ad-integrum restitution of the lungs is rather less frequent.[3-5] While functional sequels are mostly due to restrictive or mixed functional

disorders,[6-8] post-tuberculosis airflow obstruction is also present in an important number of patients.[8-11] The prevalence of post-tuberculosis airflow obstruction ranges between 5%

and 30% across published studies.[12-15] Furthermore, pathophysiological studies suggest that lesions affecting exclusively the distal respiratory pathways are possible during

pulmonary tuberculosis.[10]

We are not aware of published studies on post-tuberculosis distal airflow obstruction (DAO)

and the possible connection with persistence of respiratory signs following treatment for

pulmonary tuberculosis. The assessment of DAO in routine practice is still a challenge with

regard to the indices to be used; however, many have suggested mean median expiratory flow

or forced expiratory flow between 25% and 75% (FEF<sub>25-75%</sub>) to be useful for this purpose. The

wide variability of this index limits the possibility of defining a reliable optimal threshold for

diagnosing DAO.[16] The thresholds of 65% or 60% have been applied in children to

characterise distal airflow obstruction.[17, 18] The aim of this study was to determine the

prevalence and factors associated with post-tuberculosis chronic respiratory signs, and to

assess the clinical impact of a low FEF<sub>25-75%</sub> in a group of patients successfully treated for

pulmonary tuberculosis.

## MATERIALS AND METHODS

### Study setting and participants

This study was conducted in the Center for Diagnosis and Treatment of tuberculosis (CDT) of

the Yaounde Jamot Hospital (YJH) between November 2012 and April 2013 (6 months

duration). This centre has been described in details previously.[19, 20] In short, YJH is the

reference centre for tuberculosis and chest diseases for the Capital city of Cameroon

Field Code Changed

(Yaounde) and surrounding areas. Over the last five years, the centre has diagnosed and treated an average of 1600 to 1800 patients with tuberculosis per year.

All patients age 18 years and above, successfully treated for bacteriologically proven pulmonary tuberculosis (new case or re-treatment) were invited to take part in the study. Bacteriological proofs of pulmonary tuberculosis was based on the presence of acid fast bacillary (AFB) on at least one direct sputum smear examination,<sup>[21]</sup> or a positive sputum culture for *Mycobacterium tuberculosis*. Sputum culture and drugs susceptibility test (DST) were done for all retreatment cases. Patients with any of the following conditions were excluded: patients with treatment failure, patients with resistance to at least one antituberculosis drug, on-going bacterial pneumonia or within the four weeks preceding inclusion, chronic respiratory condition before TB diagnosis, on-going treatment with beta blockers, physical or mental inability to perform spirometry test.

### ***Pulmonary tuberculosis treatment***

Tuberculosis treatment at the CDT follows to the guidelines of the Cameroon National Tuberculosis Control Program (NTCP) and the World Health Organization (WHO) recommendations.<sup>[22, 23]</sup> Antituberculosis drugs are dispensed free of charge, and treatment regimens used are standard regimens of category I for new patients and of category II for re-treatment cases. New cases are treated with a regimen that includes an intensive phase of two months duration with rifampicin (R), isoniazid (H), ethambutol (E) and pyrazinamide (Z), followed by a 4-month continuation phase with rifampicin and isoniazid (2RHEZ/4RH). During re-treatment, category I medications (R, H, E, Z) are completed with streptomycin (S). Therefore, re-treatment cases are treated with RHEZS for two months, followed by one month on RHEZ and five months on RHE (2RHEZS/1RHEZ/5RHE). During the intensive phase, adherence is directly monitored by the healthcare team for patients admitted, and during weekly drug collection in those treated as outpatients. The continuation phase is conducted on the outpatient basis and adherence assessed during monthly visits for scripts renewal and drugs collection.

### ***Monitoring and outcomes of pulmonary tuberculosis treatment***

During treatment, sputum smear positive patients are re-examined for AFB at the end of month 2, 5 and 6 for new cases, and at the end of month 3, 5 and 8 for re-treated patients. At the end of the treatment, patients are ranked into mutually exclusive categories<sup>[22, 23]</sup> as: 1) cured – patient with negative smear at the last month of treatment and at least one of the

Field Code Changed

1  
2  
3  
4  
5  
6 preceding; 2) treatment completed – patient who has completed the treatment and for whom  
7 the smear result at the end of the last month is not available; 3) failure – patient with positive  
8 smear at the 5<sup>th</sup> month or later during treatment; 4) death – death from any cause during  
9 treatment; 5) defaulter – patient who's treatment has been interrupted for at least two  
10 consecutive months; 6) transfer – patient transferred to complete his treatment in another  
11 centre and who's treatment outcome is unknown.  
12

## 13 14 15 **Procedures**

### 16 ***Baseline data collection***

17  
18  
19 In this cross-sectional study, baseline data were collected on socio-demographic, clinical,  
20 radiological and biological characteristics of patients. Socio-demographic data collected  
21 included age, sex, residence (urban vs. rural) and formal level of education. Past medical  
22 history data included current or former smoking (yes vs. no), past history of tuberculosis and  
23 co-morbidities (diabetes mellitus). Clinical details included: duration of symptoms prior to  
24 tuberculosis diagnosis, persistent of respiratory symptoms (cough, expectoration, dyspnoea).  
25

26  
27 Patients whose symptoms continued at the end of TB treatment were considered as having  
28 persistent respiratory symptoms. Radiographic data were collected on the extension of lungs  
29 involvement (number of fields affected), the type of lung lesions (cavities, fibrotic lesions),  
30 the presence of pleural effusion and mediastinal or hilar lymph nodes. Biological data  
31 included the results of the HIV test result. The study was approved by the administrative  
32 authorities of the YJH and institutional review board of the Faculty of Medicine and  
33 Biomedical Sciences of University of Yaounde 1.  
34  
35  
36  
37  
38

### 39 ***Ventilatory variables measurement***

40  
41 The spirometric measurements were done in the month following the completion of TB  
42 treatment. Spirometric measurements were acquired with a digital turbine pneumotachograph  
43 (Spiro USB, Care fusion, Yorba Linda-USA) following the 1994 American Thoracic Society  
44 (ATS) standards.[24] All the pulmonary volumes and flow rates were automatically corrected  
45 for body temperature and pressure saturation. Measurements were done under the direct  
46 supervision of an experienced pneumologist who is also certified in lung function testing  
47 (EWPY). The different respiratory indices were measured without bronchodilators and  
48 included: forced vital capacity (FVC), forced expiratory volume during the first second  
49 (FEV1), forced expiratory flow between 25% and 75% of vital capacity (FEF<sub>25-75%</sub>) and the  
50  
51  
52  
53  
54  
55  
56  
57  
58  
59  
60

Field Code Changed



ratio FEV1/FVC. The acceptability and reproducibility criteria recommended by the ATS and European Respiratory Society (ERS) guidelines (ATS/ERS guidelines) were respected.<sup>[16]</sup> At least three manoeuvres up to a maximum of eight were performed as required to obtain the flow rate curve (FVC curve). A one minute resting period was observed between consecutive manoeuvres. Satisfactory exhalation was considered in the presence of any of the following: 1) no change in exhaled volume (plateau on the volume-time curve) for 1 second after an exhalation time of at least 6 seconds; 2) the presence of a reasonable duration or plateau in the volume-time curve; 3) inability of the subject to continue to exhale.<sup>[16, 24]</sup> The largest values for FEV1 and FVC from three acceptable manoeuvres were retained. The authorized difference between the largest values of FVC or FEV1 of the three acceptable manoeuvres was inferior or equal to 0.150 L or 5%. The manoeuvre with the largest sum of FEV1 plus FVC was used to determine FEF<sub>25-75%</sub>. Predicted values were calculated using reference values based on the Global Lung Initiative (GLI) reference spirometric equations for black.<sup>[25]</sup> Included participants were categorised according to their FEF<sub>25-75%</sub> into 3 mutually exclusive groups: normal (FEF<sub>25-75%</sub> ≥ 80%), intermediate (65% ≤ FEF<sub>25-75%</sub> < 80%) and low (FEF<sub>25-75%</sub> < 65%). DAO was based on FEF<sub>25-75%</sub> < 65%.

Field Code Changed

Field Code Changed

Field Code Changed

Field Code Changed

### Statistical analysis

Data were analysed with the use of SPSS v17 for Windows®. We have presented categorical variables as count (percentages) and quantitative variables as mean (standard deviation) or median (25<sup>th</sup>-75<sup>th</sup> percentiles). Group's comparison used chi square tests for categorical variables and Student's t-test for non-parametric equivalents for quantitative variables. Logistic regressions were then used to investigate the determinants of persisting chronic respiratory signs. Potential candidate determinants were first investigated in univariate analysis. Significant predictors (based on a threshold probability <0.1) were entered all together in the same multivariable model. A p-value <0.05 was used to characterise statistically significant results.

## RESULTS

### General characteristics of the study population and prevalence of chronic respiratory signs

A total of 189 patients were invited to take part in the study. One refused to consent, ten had incorrect spirometry records (not acceptable and/or not reproducible manoeuvres) while one

1  
2  
3  
4  
5  
6  
7  
8  
9  
10  
11  
12  
13  
14  
15  
16  
17  
18  
19  
20  
21  
22  
23  
24  
25  
26  
27  
28  
29  
30  
31  
32  
33  
34  
35  
36  
37  
38  
39  
40  
41  
42  
43  
44  
45  
46  
47  
48  
49  
50  
51  
52  
53  
54  
55  
56  
57  
58  
59  
60

had a FEV1/FVC<0.70. Of the 177 participants included, 101 (57.1%) were men and median age (25<sup>th</sup>-75<sup>th</sup> percentile) was 32 (24-45.5) years. Thirty-five (19.8%) patients were current or ex-smokers, 23 (13%) had a prior history of pulmonary tuberculosis and 47 (26.6%) had co-incident HIV infection. At least one chronic respiratory sign (CRS) was found in 110 (62.1%) patients at the completion of the anti-tuberculosis treatment. In details, 87 (49.2%), 62 (35%) and 99 (55.9%) patients had persisting cough, expectoration and dyspnoea respectively at treatment completion (Table 1 and Figure 1).

**Table 1: Characteristics of study population at the end of tuberculosis treatment**

| Characteristics                                                                           | n=177 (%)     |
|-------------------------------------------------------------------------------------------|---------------|
| Baseline clinical characteristics                                                         |               |
| Male sex                                                                                  | 101 (57.1)    |
| Age, years, median (25 <sup>th</sup> -75 <sup>th</sup> )                                  | 32 (24-45.5)  |
| Median duration of symptoms before diagnosis, weeks (25 <sup>th</sup> -75 <sup>th</sup> ) | 8 (4-12)      |
| Current or past smoking                                                                   | 35 (19.8)     |
| Previous pulmonary tuberculosis                                                           | 23 (13)       |
| HIV infection                                                                             | 47 (26.6)     |
| Diabetes mellitus                                                                         | 4 (2.3)       |
| Radiological signs                                                                        |               |
| Extension of tuberculosis lesions > 4 zones                                               | 52/148 (35.1) |
| Cavitary disease                                                                          | 81/148 (45.8) |
| Persisting respiratory symptoms at the end of tuberculosis treatment                      |               |
| Any respiratory symptoms                                                                  | 110 (62.1)    |
| Cough                                                                                     | 87 (49.2)     |
| Expectoration                                                                             | 62 (35.0)     |
| Dyspnoea                                                                                  | 99 (55.9)     |
| Spirometry values at the end of tuberculosis treatment                                    |               |
| FEV1, %, mean (SD)                                                                        | 76.3 (19.0)   |
| FVC, %, mean (SD)                                                                         | 74.8 (18.2)   |
| FEV1/FVC                                                                                  | 0.86 (0.07)   |
| FEF <sub>25-75%</sub> , %, median (25 <sup>th</sup> -75 <sup>th</sup> )                   | 74 (56-94.5)  |

FEV1, forced expiratory volume in 1<sup>st</sup> second; FVC, forced vital capacity;  
FEF<sub>25-75%</sub>, forced expiratory flow between 25 and 75% FVC;  
SD, standard deviation

### Relationship between FEF<sub>25-75%</sub> and chronic respiratory signs

Table 2 shows the distribution of chronic respiratory signs at treatment completion, according to FEF<sub>25-75%</sub> categories. Seventy-five patients (42.4%) had normal FEF<sub>25-75%</sub>, 35 (19.8%) had intermediate FEF<sub>25-75%</sub>, while 67 (37.9%) had low FEF<sub>25-75%</sub>. Persisting cough, expectoration and dyspnoea were significantly more frequent among patients with low FEF<sub>25-75%</sub>. The frequency of at least one persisting chronic respiratory sign was 52% in patients with normal FEF<sub>25-75%</sub> and 74.6% among those with low FEF<sub>25-75%</sub> (p=0.005). The related odd ratio was 2.72 (95% confidence interval: 1.33-5.57).

**Table 2: Frequency of persistent respiratory symptoms and spirometry indices according to FEF<sub>25-75%</sub>**

| Symptoms                                                             | FEF <sub>25-75%</sub> ≥ 80%,<br>n=75 (%) | FEF <sub>25-75%</sub> between 65%<br>and 80%, n=35(%) | FEF <sub>25-75%</sub> < 65%,<br>n=67 (%) | p-value |
|----------------------------------------------------------------------|------------------------------------------|-------------------------------------------------------|------------------------------------------|---------|
| chronic cough                                                        | 28 (37.3)                                | 17 (48.6)                                             | 42 (62.7)                                | 0.011   |
| Chronic expectoration                                                | 20 (26.7)                                | 11 (31.4)                                             | 31 (46.3)                                | 0.050   |
| Chronic dyspnoea                                                     | 38 (50.7)                                | 16 (45.7)                                             | 45 (67.2)                                | 0.056   |
| Any chronic<br>respiratory symptoms                                  | 39 (52.0)                                | 21 (60.0)                                             | 50 (74.6)                                | 0.020   |
| FEV1, %, median (25 <sup>th</sup> -<br>75 <sup>th</sup> percentiles) | 89(82-100)                               | 73(62-82)                                             | 64(52-73)                                | <0.001  |
| FVC, %, (25 <sup>th</sup> -75 <sup>th</sup><br>percentiles)          | 83(74-92)                                | 72(61-83)                                             | 64(53-77)                                | <0.001  |
| FEV1/FVC, mean (SD)                                                  | 0.89(0.04)                               | 0.86(0.05)                                            | 0.81(0.06)                               | <0.001  |

Formatted Table

FEV1, forced expiratory volume in 1<sup>st</sup> second; FVC, forced vital capacity; FEF<sub>25-75%</sub>, forced expiratory flow between 25 and 75% FVC; SD, standard deviation  
FEF<sub>25-75%</sub>, forced expiratory flow between 25 and 75% of forced vital capacity

### Predictors of persisting respiratory signs at the completion of antituberculosis treatment

Univariable and multivariable adjusted determinants of persisting respiratory signs are shown in Table 3. [There is no association between smoking volume \(pack-years\) and persistent of CRS \(data not shown\)](#). Independent predictors of persisting signs were longer duration of symptoms prior to tuberculosis diagnosis [odd ratio 2.91 (95% confidence interval: 1.91-7.60) for symptoms duration greater than 12 weeks], and DAO [2.22 (1.13-4.38)].

1  
2  
3  
4  
5  
6  
7  
8  
9  
10  
11  
12  
13  
14  
15  
16  
17  
18  
19  
20  
21  
22  
23  
24  
25  
26  
27  
28  
29  
30  
31  
32  
33  
34  
35  
36  
37  
38  
39  
40  
41  
42  
43  
44  
45  
46  
47  
48  
49  
50  
51  
52  
53  
54  
55  
56  
57  
58  
59  
60**Table 3: Determinants of persistent of chronic respiratory symptoms at the end of tuberculosis treatment**

| Facteurs                                 | Crude OR (95% CI) | p-value | Adjusted OR (95% CI) | p-value |
|------------------------------------------|-------------------|---------|----------------------|---------|
| Male sex                                 | 1.31 (0.71-2.44)  | 0.387   | /                    | /       |
| Age                                      | 1.01 (0.98-1.03)  | 0.646   | /                    | /       |
| Duration of symptoms > 12 weeks          | 3.31 (1.29-8.50)  | 0.013   | 2.91(1.12-7.60)      | 0.029   |
| Smoking                                  | 1.68 (0.75-3.76)  | 0.209   | /                    | /       |
| Previous pulmonary tuberculosis          | 1.86 (0.69-4.98)  | 0.218   | /                    | /       |
| HIV infection                            | 0.76 (0.39-1.51)  | 0.439   | /                    | /       |
| Extension of pulmonary lesions > 4 zones | 1.48 (0.71-3.07)  | 0.292   | /                    | /       |
| Cavitary disease                         | 1.12 (0.57-2.20)  | 0.751   | /                    | /       |
| Fibrotic lesions                         | 1.24 (0.59-2.62)  | 0.571   | /                    | /       |
| FEF <sub>25-75%</sub>                    | 2.45 (1.26-4.77)  | 0.008   | /                    | /       |
| ≥ 80%                                    | 1 (reference)     |         |                      | /       |
| 65%-79%                                  | 1.39 (0.61-3.13)  | 0.433   | /                    | /       |
| < 65%                                    | 2.72 (1.33-5.54)  | 0.006   | 2.22 (1.13-4.38)     | 0.021   |

FEF<sub>25-75%</sub>, forced expiratory flow between 25 and 75% of forced vital capacity; OR, odds ratio; CI, confidence interval

### Relationship of FEF<sub>25-75%</sub> with other spirometry indices

In this study, FEV1 and FVC were significantly low in patients with low or intermediate FEF<sub>25-75%</sub> compared to those with normal FEF<sub>25-75%</sub> ( $p < 0.001$ ). The ratio FEV1/FVC was higher in patients with normal (0.89) than in those with intermediate (0.86) or low (0.81) FEF<sub>25-75%</sub> (Table 2).

## DISCUSSION

The main findings from this study conducted among patients successfully treated for pulmonary tuberculosis in a region of medium endemicity for tuberculosis are the following :

1) the prevalence of persisting chronic respiratory signs after treatment is very high ; 2) about two in five patients with normal FEV1/FVC have DAO ; 3) DAO is more frequent among patients with persisting chronic respiratory signs after anti-tuberculosis treatment ; 4) long duration of symptoms prior to tuberculosis diagnosis is a predictive factor for persisting respiratory signs following successful treatment for tuberculosis.

Functional post-tuberculosis sequels have been largely characterised.[4, 10, 11] However, few studies have reported on persisting chronic respiratory signs following the treatment of pulmonary tuberculosis. Even in the absence of functional sequels, post-tuberculous persisting chronic respiratory signs can negatively impact on the quality of life of individuals. In our series, three fifths of patients had persisting chronic respiratory signs following treatment for pulmonary tuberculosis. In a recent review from South Africa, chronic bronchitis and dyspnoea were two to seven times more frequent in people with a history of tuberculosis than in those who had never had tuberculosis.[11]

Persisting chronic respiratory signs were associated with prolonged duration of symptoms prior to tuberculosis diagnosis in our study. Lee and co-workers also found that the presence of bronchial obstruction in the post-pulmonary tuberculosis treatment period was influenced by the duration of symptoms prior to starting treatment.[13] Distal bronchial obstruction was found in over a third of our participants. It was independently associated with persisting chronic pulmonary signs, and further associated with a worse profile of spirometry indices. These independent associations suggest that, in addition to confirming the bacteriological cure of the infection, people completing treatment for pulmonary tuberculosis should also be investigated for the presence of functional respiratory signs and indicators of distal airways lesions, in order to optimise their management. There are several interrelated mechanisms to explain the occurrence of post-tuberculous distal bronchial obstruction. Bronchial endothelial inflammation during pulmonary tuberculosis could lead to localised or generalised bronchial obstruction, pulmonary fibrosis, and increase airways' resistance. The destruction of the lung' parenchyma could also reduce the pulmonary compliance and cause the small airways to collapse.[10]

Field Code Changed

1  
2  
3  
4  
5  
6  
7 The cross-sectional nature is the main limitation of this study, precluding any inference about  
8 the direction of the relationships found in the study. However, in on historical cohort, Hnidzo  
9 and co-workers found a gradual decrease in the pulmonary function with the increasing  
10 episodes of tuberculosis.[7] It is likely that DAO in our study was the consequence of  
11 pulmonary tuberculosis, considering that all patients with known chronic bronchitis prior to  
12 tuberculosis occurrence were excluded. The relatively large number of patients included is a  
13 major strength.  
14  
15

16  
17 In conclusion, low FEF<sub>25-75%</sub> is useful criteria for diagnosing distal airflow obstruction in  
18 patients treated for pulmonary tuberculosis and who otherwise, have normal FEV1/FVC ratio.  
19 Persisting chronic respiratory signs following treatment for tuberculosis are very frequent and  
20 often associated with DAO. Furthermore, prolonged duration of symptoms prior to starting  
21 treatment appears to be a major determinant of persisting post-tuberculous chronic respiratory  
22 signs. Sensitisation of the population to consult early with tuberculosis-like symptoms has a  
23 potential for improving early diagnosis/treatment and reduction of the prevalence of post-  
24 tuberculosis DAO.  
25  
26

27  
28  
29 **Funding:** This research received no specific grant from any funding agency in the public,  
30 commercial or not-for-profit sectors.  
31

32  
33 **Competing interests:** None for all authors.  
34

35  
36 **Ethics approval:** Ethics approval was provided by the Institutional Review Board of  
37 Yaounde Jamot Hospital.  
38

39  
40 **Contributors:** EWPY conceived the study, collected data, co-analysed the data and drafted  
41 the manuscript. APK contributed to study design, data analysis, drafting and critical revision  
42 of the manuscript. PETK collected data, co-analysed data and critical revised the manuscript.  
43 EAZ supervised data collection and critically revised the manuscript. All authors approved the  
44 final version of the manuscript.  
45  
46

## 47 48 49 REFERENCES

- 50  
51 1. World Health Organisation. Global tuberculosis report 2013.  
52 [http://apps.who.int/iris/bitstream/10665/75938/1/9789241564502\\_eng.pdf](http://apps.who.int/iris/bitstream/10665/75938/1/9789241564502_eng.pdf)  
53 (Accessed 29 March 2014).  
54  
55

Field Code Changed

- 1
- 2
- 3
- 4
- 5
- 6
- 7 2. Aït-Khaled N, Alarcón E, Armengol R et al. Prise en charge de la tuberculose. Guide des éléments essentiels pour une bonne pratique. Sixième édn. Paris:Union Internationale Contre la Tuberculose et les Maladies Respiratoires, 2010:P10.
- 8
- 9
- 10 3. Al-Hajjaj MS, Joharjy IA. Predictors of radiological sequelae of pulmonary tuberculosis. *Acta Radiol* 2000; 41:533-7.
- 11
- 12
- 13 4. Sivaranjini S, Vanamail P, Eason J. Six minute walk test in people with tuberculosis sequelae. *Cardiopulm Phys Ther J* 2010; 21:5-10.
- 14
- 15
- 16 5. Pasipanodya JG, Miller TL, Vecino M, et al. Pulmonary impairment after tuberculosis. *Chest* 2007; 131:1817-24.
- 17
- 18
- 19 6. Chung KP, Chen JY, Lee CH, et al. Trends and predictors of changes in pulmonary function after treatment for pulmonary tuberculosis. *Clinics (Sao Paulo)* 2011; 66:549-56.
- 20
- 21
- 22 7. Hnizdo E, Singh T, Churchyard G. Chronic pulmonary function impairment caused by initial and recurrent pulmonary tuberculosis following treatment. *Thorax* 2000; 55:32-38.
- 23
- 24
- 25 8. Ramos LM, Sulmonett N, Ferreira CS, et al. Functional profile of patients with tuberculosis sequelae in a university hospital. *J Bras Pneumol* 2006; 32:43-47.
- 26
- 27 9. Lee EJ, Lee SY, In KH, et al. Routine pulmonary function test can estimate the extent of tuberculous destroyed lung. *ScientificWorldJournal* 2012; 2012:835031.
- 28
- 29 10. Chakrabarti B, Calverley PM, Davies PD. Tuberculosis and its incidence, special nature, and relationship with chronic obstructive pulmonary disease. *Int J Chron Obstruct Pulmon Dis* 2007; 2:263-72.
- 30
- 31 11. Ehrlich RI, Adams S, Baatjies R, et al. Chronic airflow obstruction and respiratory symptoms following tuberculosis: a review of South African studies. *Int J Tuberc Lung Dis* 2011; 15:886-91.
- 32
- 33 12. Lee SW, Kim YS, Kim DS, et al. The risk of obstructive lung disease by previous pulmonary tuberculosis in a country with intermediate burden of tuberculosis. *J Korean Med Sci* 2011; 26:268-73.
- 34
- 35 13. Lee CH, Lee MC, Lin HH, et al. Pulmonary tuberculosis and delay in anti-tuberculous treatment are important risk factors for chronic obstructive pulmonary disease. *PLoS One* 2012; 7:e37978.
- 36
- 37 14. Menezes AM, Hallal PC, Perez-Padilla R, et al. Tuberculosis and airflow obstruction: evidence from the PLATINO study in Latin America. *Eur Respir J* 2007; 30:1180-5.
- 38
- 39
- 40
- 41
- 42
- 43
- 44
- 45
- 46
- 47
- 48
- 49
- 50
- 51
- 52
- 53
- 54
- 55
- 56
- 57
- 58
- 59
- 60

15. Akkara SA, Shah AD, Adalja M, et al. Pulmonary tuberculosis: the day after. *Int J Tuberc Lung Dis* 2013; 17:810-3.
16. Miller MR, Hankinson J, Brusasco V, et al. Standardisation of spirometry. *Eur Respir J* 2005, 26:319-38.
17. Ciprandi G, Capasso M, Tosca M, et al. A forced expiratory flow at 25-75% value <65% of predicted should be considered abnormal: a real-world, cross-sectional study. *Allergy Asthma Proc* 2012, 33:e5-8.
18. Rao DR, Gaffin JM, Baxi SN, et al. The utility of forced expiratory flow between 25% and 75% of vital capacity in predicting childhood asthma morbidity and severity. *J Asthma* 2012, 49:586-92.
19. Pefura Yone EW, Kengne AP, Kuaban C. Incidence, time and determinants of tuberculosis treatment default in Yaounde, Cameroon: a retrospective hospital register-based cohort study. *BMJ open* 2011, 1:e000289.
20. Yone EW, Kuaban C, Kengne AP. HIV testing, HIV status and outcomes of treatment for tuberculosis in a major diagnosis and treatment centre in Yaounde, Cameroon: a retrospective cohort study. *BMC Infect Dis* 2012; 12:190.
21. Programme National de Lutte contre la Tuberculose. Guide technique pour le personnel de santé. Yaounde. 2012.
22. National Tuberculosis Control Program. Manual for health personnel. Yaounde. 2006.
23. World Health Organisation. Treatment of tuberculosis guidelines. Geneva. 2009.
24. Standardization of Spirometry, 1994 Update. American Thoracic Society. *Am J Respir Crit Care Med* 1995; 152:1107-36.
25. Quanjer PH, Stanojevic S, Cole TJ, et al. Multi-ethnic reference values for spirometry for the 3-95-yr age range: the global lung function 2012 equations. *Eur Respir J* 2012; 40:1324-43.



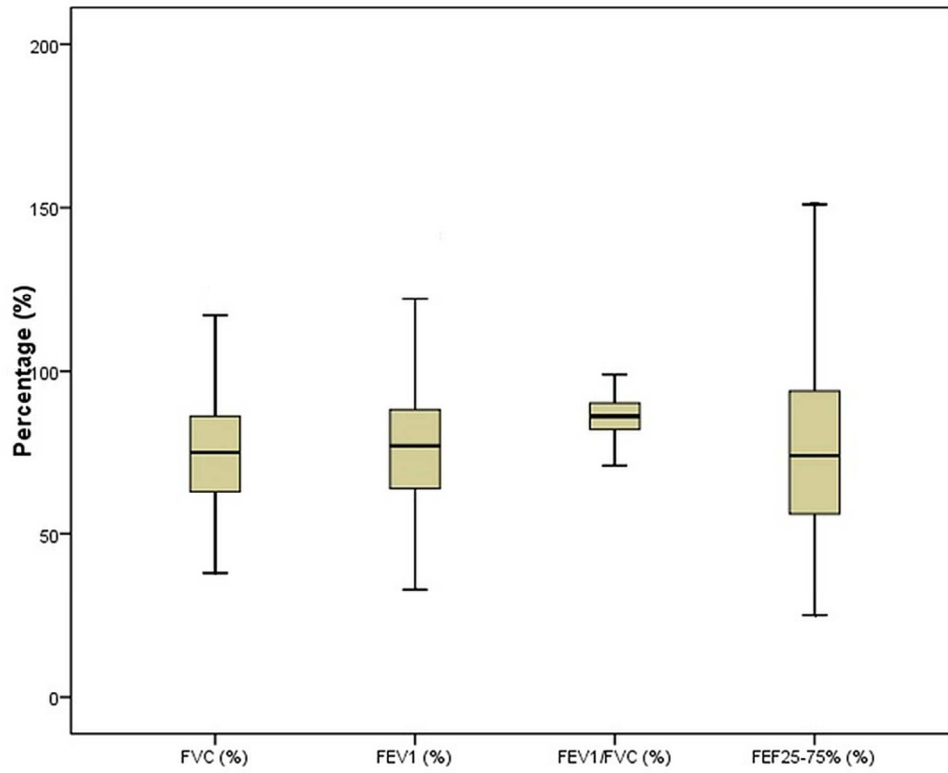

Figure 1: Spirometric indices of study population  
 FEV1, forced expiratory volume in 1s; FVC, forced vital capacity; FEF25-75%, forced expiratory flow  
 between 25% and 75%  
 90x71mm (300 x 300 DPI)

View only

1  
2  
3  
4  
5  
6  
7  
8  
9  
10  
11  
12  
13  
14  
15  
16  
17  
18  
19  
20  
21  
22  
23  
24  
25  
26  
27  
28  
29  
30  
31  
32  
33  
34  
35  
36  
37  
38  
39  
40  
41  
42  
43  
44  
45  
46  
47  
48  
49  
50  
51  
52  
53  
54  
55  
56  
57  
58  
59  
60

STROBE 2007 (v4) Statement—Checklist of items that should be included in reports of *cross-sectional studies*

| Section/Topic                | Item # | Recommendation                                                                                                                                                                       | Reported on page # |
|------------------------------|--------|--------------------------------------------------------------------------------------------------------------------------------------------------------------------------------------|--------------------|
| Title and abstract           | 1      | (a) Indicate the study's design with a commonly used term in the title or the abstract                                                                                               | 2                  |
|                              |        | (b) Provide in the abstract an informative and balanced summary of what was done and what was found                                                                                  | 2                  |
| <b>Introduction</b>          |        |                                                                                                                                                                                      |                    |
| Background/rationale         | 2      | Explain the scientific background and rationale for the investigation being reported                                                                                                 | 4                  |
| Objectives                   | 3      | State specific objectives, including any prespecified hypotheses                                                                                                                     | 4                  |
| <b>Methods</b>               |        |                                                                                                                                                                                      |                    |
| Study design                 | 4      | Present key elements of study design early in the paper                                                                                                                              | 6                  |
| Setting                      | 5      | Describe the setting, locations, and relevant dates, including periods of recruitment, exposure, follow-up, and data collection                                                      | 4,5                |
| Participants                 | 6      | (a) Give the eligibility criteria, and the sources and methods of selection of participants                                                                                          | 5                  |
| Variables                    | 7      | Clearly define all outcomes, exposures, predictors, potential confounders, and effect modifiers. Give diagnostic criteria, if applicable                                             | 5,6,7              |
| Data sources/<br>measurement | 8*     | For each variable of interest, give sources of data and details of methods of assessment (measurement). Describe comparability of assessment methods if there is more than one group | 6,7                |
| Bias                         | 9      | Describe any efforts to address potential sources of bias                                                                                                                            | 5                  |
| Study size                   | 10     | Explain how the study size was arrived at                                                                                                                                            | /                  |
| Quantitative variables       | 11     | Explain how quantitative variables were handled in the analyses. If applicable, describe which groupings were chosen and why                                                         | 7                  |
| Statistical methods          | 12     | (a) Describe all statistical methods, including those used to control for confounding                                                                                                | 7                  |
|                              |        | (b) Describe any methods used to examine subgroups and interactions                                                                                                                  | 7                  |
|                              |        | (c) Explain how missing data were addressed                                                                                                                                          | Not applicable     |
|                              |        | (d) If applicable, describe analytical methods taking account of sampling strategy                                                                                                   | Not applicable     |
|                              |        | (e) Describe any sensitivity analyses                                                                                                                                                | Not applicable     |
| <b>Results</b>               |        |                                                                                                                                                                                      |                    |

|                          |     |                                                                                                                                                                                                              |                |
|--------------------------|-----|--------------------------------------------------------------------------------------------------------------------------------------------------------------------------------------------------------------|----------------|
| Participants             | 13* | (a) Report numbers of individuals at each stage of study—eg numbers potentially eligible, examined for eligibility, confirmed eligible, included in the study, completing follow-up, and analysed            | 7              |
|                          |     | (b) Give reasons for non-participation at each stage                                                                                                                                                         | 7              |
|                          |     | (c) Consider use of a flow diagram                                                                                                                                                                           | /              |
| Descriptive data         | 14* | (a) Give characteristics of study participants (eg demographic, clinical, social) and information on exposures and potential confounders                                                                     | 7,8            |
|                          |     | (b) Indicate number of participants with missing data for each variable of interest                                                                                                                          | Not applicable |
| Outcome data             | 15* | Report numbers of outcome events or summary measures                                                                                                                                                         | 9              |
| Main results             | 16  | (a) Give unadjusted estimates and, if applicable, confounder-adjusted estimates and their precision (eg, 95% confidence interval). Make clear which confounders were adjusted for and why they were included | 9,10           |
|                          |     | (b) Report category boundaries when continuous variables were categorized                                                                                                                                    | 9,10           |
|                          |     | (c) If relevant, consider translating estimates of relative risk into absolute risk for a meaningful time period                                                                                             | Not applicable |
| Other analyses           | 17  | Report other analyses done—eg analyses of subgroups and interactions, and sensitivity analyses                                                                                                               | /              |
| <b>Discussion</b>        |     |                                                                                                                                                                                                              |                |
| Key results              | 18  | Summarise key results with reference to study objectives                                                                                                                                                     | 11             |
| Limitations              | 19  | Discuss limitations of the study, taking into account sources of potential bias or imprecision. Discuss both direction and magnitude of any potential bias                                                   | 12             |
| Interpretation           | 20  | Give a cautious overall interpretation of results considering objectives, limitations, multiplicity of analyses, results from similar studies, and other relevant evidence                                   | 11,12          |
| Generalisability         | 21  | Discuss the generalisability (external validity) of the study results                                                                                                                                        | 11             |
| <b>Other information</b> |     |                                                                                                                                                                                                              |                |
| Funding                  | 22  | Give the source of funding and the role of the funders for the present study and, if applicable, for the original study on which the present article is based                                                | 12             |

\*Give information separately for cases and controls in case-control studies and, if applicable, for exposed and unexposed groups in cohort and cross-sectional studies.

**Note:** An Explanation and Elaboration article discusses each checklist item and gives methodological background and published examples of transparent reporting. The STROBE checklist is best used in conjunction with this article (freely available on the Web sites of PLoS Medicine at <http://www.plosmedicine.org/>, Annals of Internal Medicine at <http://www.annals.org/>, and Epidemiology at <http://www.epidem.com/>). Information on the STROBE Initiative is available at [www.strobe-statement.org](http://www.strobe-statement.org).
